# Supplementary material for: A steric hindrance-regulated probe with single excitation dual emissions for self-adaptive detection of biothiols and H 2 S in human urine samples and living cells
Source: Royal Society of Chemistry journal article supplement (doi:10.1039/d4tb02787f), 2025-01-01
Supplement: d4tb02787f1.pdf [file d4tb02787f1.pdf]

Supporting Information for:

**A steric hindrance regulated probe with single excitation dual emissions for self-adaptive detection of biothiols and H<sub>2</sub>S in human urine samples and living cells**

Zhan Wang<sup>b, #</sup>, Wenbo Shi<sup>c #</sup>, Yi-Jun Gong<sup>d, #</sup>, Yanjun Du<sup>c</sup>, Wei Luo<sup>a</sup>, Huang Zhou<sup>a</sup>, and Ke Pan<sup>a, \*</sup>

<sup>a</sup> Department of General Surgery, The Second Xiangya Hospital, Central South University, Changsha, China

<sup>b</sup> Department of Medical Oncology, Lung Cancer and Gastrointestinal Unit, Hunan Cancer Hospital/The Affiliated Cancer Hospital of Xiangya School of Medicine, Central South University, Changsha 410000, China.

<sup>c</sup> Department of Medical Oncology, Ruijin-Hainan Hospital, Shanghai Jiao Tong University School of Medicine, Qionghai City, Hainan Province, 571442, China.

<sup>d</sup> School of Chemistry and Chemical Engineering, Henan Normal University, Xinxiang, 453007, P. R. China

<sup>#</sup> co-first authors; <sup>\*</sup> corresponding author: Email: panke@csu.edu.cn, gongyijun@htu.edu.cn

**Table of Contents**

|                                                 |            |
|-------------------------------------------------|------------|
| <b>1. Experimental procedures .....</b>         | <b>S2</b>  |
| <b>2. Supplementary figures.....</b>            | <b>S6</b>  |
| <b>3. Supplementary NMR and MS spectra.....</b> | <b>S29</b> |

## 1. Experimental procedures

### Reagents and apparatus

All primary chemical reagents, including 2-Hydroxy acetophenone, 2,5,5-Trimethylcyclohexanone (isophorone), 3-Hydroxy-3-methyl-2-butanone, Malononitrile, 4-Hydroxybenzaldehyde, 3,5-Difluoro-4-hydroxybenzaldehyde, 4-Chloro-7-nitro-2,1,3-benzoxadiazole (NBD-Cl), *N*-Ethylmaleimide (NEM), and ultra dry solvents, are purchased from Energy Chemical (Shanghai, China). Ultrapure water from a Millipore Milli-Q water purification system (Billerica, MA, USA) for preparation of all aqueous solutions. The pH measurements were carried out with a Mettler-Toledo Delta 320 pH meter. Thin layer chromatography (TLC) analysis was performed on fluorescent thin-layer plates, and column chromatography was conducted over a silica gel (mesh 200–300). <sup>1</sup>H and <sup>13</sup>C NMR spectra were recorded using a Bruker DRX-600 or 400 spectrometer with chemical shifts reported as ppm (tetramethyl silane as internal standard). High resolution mass spectra (HRMS) were recorded using a Bruker MicroTOF-QII mass instrument (ESI). UV-vis absorption spectra and fluorescence intensity measurements were recorded using an Agilent Cary100 UV-Vis spectrophotometer and a Hitachi F7000 fluorescence spectrophotometer, respectively. Fluorescence images of cells were obtained using an Olympus FV1000-IX81 confocal laser scanning microscope (Japan).

### Synthetic procedure

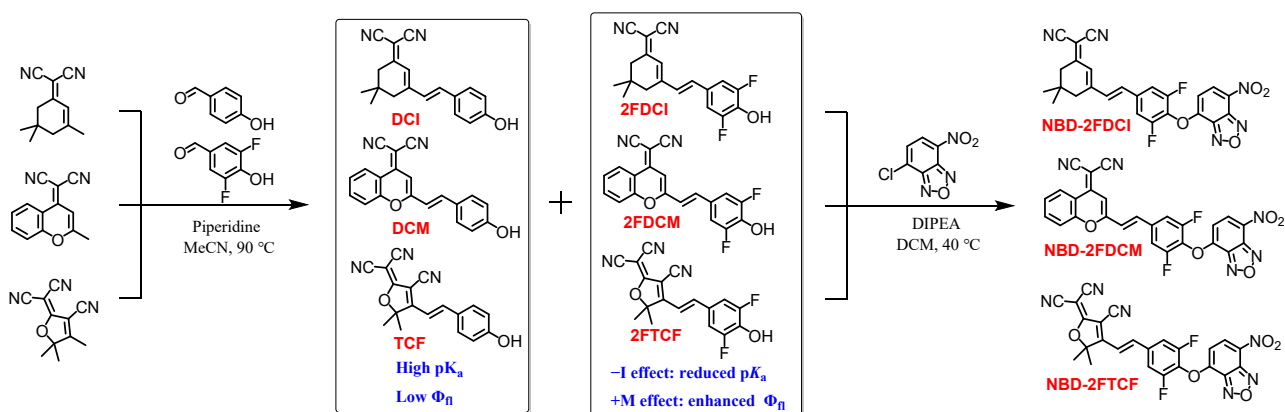

**Scheme S1.** The synthetic route.

**General synthetic procedure for dyes:** Dicyanomethylidene-1,5,5-trimethylcyclohexene (The electron withdrawing group DCI) <sup>[1]</sup>, 4-(dicyanomethylene)-2-methylchromone (The electron withdrawing group DCM) <sup>[2]</sup>, and 2-Dicyanomethylene-3-cyano-4,5,5-trimethyl-2,5-dihydrofuran (The electron withdrawing group TCF) <sup>[3]</sup> were synthesized according to the previous papers. All the hydroxyl functional dyes were synthesized according to the similar procedure. Briefly, the electron withdrawing group (DCI, DCM, or TCF, 11 mmol) and benzaldehyde (10 mmol) were dissolved in 20 mL acetonitrile with 10 drops piperidine as catalytic agent, and the mixture in opened round bottom flask was refluxed at 90 °C until the solvent was evaporated. The residue was purified by silica column chromatography.

**DCI:** DCI was purified using petroleum ether/dichloromethane (10:1 to 1:2, v/v) as an eluent to obtain a dark-red solid (2.32 g, 8.0 mmol, yield 80%). As DCI was a known compound,

characterization spectrum was not given.

**2FDCI:** 2FDCI was purified using petroleum ether/dichloromethane (10:1 to 1:2, v/v) as an eluent to obtain an orange solid (2.34 g, 7.2 mmol, yield 72%). <sup>1</sup>H NMR (600 MHz, CDCl<sub>3</sub>): δ (ppm) 7.06 (d, *J* = 7.8 Hz, 2H), 6.90-6.81 (m, 3H), 2.60 (s, 2H), 2.44 (s, 2H), 1.08 (s, 6H). <sup>13</sup>C NMR (150 MHz, CDCl<sub>3</sub>): δ (ppm) 169.44, 153.62, 151.72, 135.11, 128.69, 126.66, 123.49, 113.42, 112.65, 110.61, 78.47, 42.95, 39.15, 32.00, 27.92. HRMS (ESI) calcd for C<sub>19</sub>H<sub>16</sub>F<sub>2</sub>N<sub>2</sub>O<sub>1</sub> [M - H]<sup>-</sup> 325.1158, found 325.1148.

**DCM:** DCM was purified using dichloromethane/ethyl acetate (100:1 to 10:1, v/v) as an eluent to obtain a dark-red solid (1.84 g, 5.9 mmol, yield 59%). As DCM was a known compound, characterization spectrum was not given.

**2FDCM:** 2FDCM was purified using dichloromethane/ethyl acetate (100:1 to 10:1, v/v) as an eluent to obtain a yellow solid (2.02 g, 5.8 mmol, yield 58%). <sup>1</sup>H NMR (400 MHz, CD<sub>3</sub>OD + DMSO-*d*<sub>6</sub>): δ (ppm) 8.72 (d, *J* = 8.4 Hz, 1H), 7.78 (t, *J* = 8.0 Hz, 1H), 7.64 (d, *J* = 8.4 Hz, 1H), 7.52-7.44 (m, 2H), 7.32 (d, *J* = 9.2 Hz, 2H), 7.10 (d, *J* = 16.0 Hz, 1H), 6.84 (s, 1H). <sup>13</sup>C NMR (100 MHz, DMSO-*d*<sub>6</sub>): δ (ppm) 158.26, 153.92, 153.13, 152.33, 151.52, 137.12, 135.90, 126.61, 125.06, 119.60, 119.36, 117.45, 116.21, 112.26, 112.04, 107.11, 60.76. HRMS (ESI) calcd for C<sub>20</sub>H<sub>10</sub>F<sub>2</sub>N<sub>2</sub>O<sub>2</sub> [M - H]<sup>-</sup> 347.0638, found 347.0631.

**TCF:** TCF was purified using dichloromethane/methanol (100:1, v/v) as an eluent to obtain a dark-red solid (2.03 g, 6.7 mmol, yield 67%). As TCF was a known compound, characterization spectrum was not given.

**2FTCF:** 2FTCF was purified using dichloromethane/methanol (100:1, v/v) as an eluent to obtain a brown solid (1.97 g, 5.8 mmol, yield 58%). <sup>1</sup>H NMR (400 MHz, CD<sub>3</sub>OD + DMSO-*d*<sub>6</sub>): δ (ppm) 7.85 (d, *J* = 16.4 Hz, 1H), 7.59-7.56 (m, 2H), 7.16 (d, *J* = 16.4 Hz, 1H), 1.85 (s, 6H). <sup>13</sup>C NMR (100 MHz, CDCl<sub>3</sub>): δ (ppm) 176.73, 174.99, 153.78, 151.43, 145.59, 125.45, 114.69, 112.76, 112.05, 111.50, 110.56, 98.96, 55.40, 24.73. HRMS (ESI) calcd for C<sub>18</sub>H<sub>11</sub>F<sub>2</sub>N<sub>3</sub>O<sub>2</sub> [M - H]<sup>-</sup> 338.0747, found 338.0735.

### Synthesis of probe NBD-2FDCI

The dye 2FDCI (326 mg, 1 mmol), NBD-Cl (220 mg, 1.1 mmol), and N,N-Diisopropylethylamine (DIPEA, 350 μL, 2 mmol) were dissolved in 20 mL dichloromethane, and the reaction was stirred at 40 °C until the color of the solution changed from purple to yellow. The residue was purified by silica column chromatography using dichloromethane as an eluent to obtain the probe NBD-2FDCI as a yellow solid (284 mg, yield 58%). <sup>1</sup>H NMR (600 MHz, CDCl<sub>3</sub>): δ (ppm) 8.49 (d, *J* = 12.0 Hz, 1H), 7.27-7.25 (m, 2H), 7.02-6.90 (m, 3H), 6.72 (d, *J* = 12.0 Hz, 1H), 2.62 (s, 2H), 2.45 (s, 2H), 1.09 (s, 6H). <sup>13</sup>C NMR (150 MHz, CDCl<sub>3</sub>): δ (ppm) 167.82, 155.49, 152.93, 150.90, 150.69, 143.37, 143.13, 135.24, 131.69, 131.04, 124.53, 111.96, 111.24, 110.65, 110.43, 107.37, 79.75, 41.92, 38.19, 31.08, 26.98. HRMS (ESI) calcd for C<sub>25</sub>H<sub>17</sub>F<sub>2</sub>N<sub>3</sub>O<sub>4</sub> [M - H]<sup>-</sup> 488.1176, found 488.1174.

### Synthesis of probe NBD-2FDCM

The dye 2FDCM (348 mg, 1 mmol), NBD-Cl (220 mg, 1.1 mmol), and N,N-Diisopropylethylamine (DIPEA, 350  $\mu$ L, 2 mmol) were dissolved in 20 mL dichloromethane, and the reaction was stirred at room temperature until the color of the solution changed from purple to orange. The residue was purified by silica column chromatography using dichloromethane as an eluent to obtain the probe NBD-2FDCM as a yellow solid (383 mg, yield 75%).  $^1\text{H}$  NMR (600 MHz,  $\text{CD}_3\text{OD} + \text{DMSO-}d_6$ ):  $\delta$  (ppm) 8.97 (d,  $J = 8.4$  Hz, 1H), 8.79 (d,  $J = 7.8$  Hz, 1H), 8.12-8.08 (m, 2H), 8.01 (d,  $J = 8.4$  Hz, 2H), 7.94-7.91 (m, 2H), 7.79-7.76 (m, 2H), 7.24 (d,  $J = 9.0$  Hz, 1H). HRMS (ESI) calcd for  $\text{C}_{26}\text{H}_{11}\text{F}_2\text{N}_6\text{O}_8$   $[\text{M} + \text{NO}_3]^-$  573.0612, found 573.0604.

### Synthesis of probe NBD-2FTCF

The dye 2FTCF (339 mg, 1 mmol), NBD-Cl (220 mg, 1.1 mmol), and N,N-Diisopropylethylamine (DIPEA, 350  $\mu$ L, 2 mmol) were dissolved in 10 mL N,N-dimethylformamide, and the reaction was stirred at 40  $^\circ\text{C}$  for about 1 h until the color of the solution changed from blue to green. The mixture was diluted with 200 mL dichloromethane, washed with water and brine, and dried over anhydrous sodium sulfate. The organic phase was purified by silica column chromatography using dichloromethane/ethyl acetate (30:1 to 5:1, v/v) as an eluent to afford the probe NBD-2FTCF as a yellow solid (220 mg, yield 44%).  $^1\text{H}$  NMR (600 MHz,  $\text{CDCl}_3 + \text{CD}_3\text{OD}$ ):  $\delta$  (ppm) 8.63 (d,  $J = 8.4$  Hz, 1H), 7.87 (d,  $J = 16.4$  Hz, 1H), 7.72 (d,  $J = 8.4$  Hz, 2H), 7.27 (d,  $J = 16.4$  Hz, 1H), 6.94 (d,  $J = 8.4$  Hz, 1H).  $^{13}\text{C}$  NMR (150 MHz,  $\text{CD}_3\text{OD} + \text{DMSO-}d_6$ ):  $\delta$  (ppm) 177.64, 175.00, 156.70, 155.04, 151.44, 145.47, 144.03, 136.04, 135.22, 133.19, 119.68, 114.88, 113.22, 112.48, 111.34, 110.81, 102.77, 100.48, 57.05, 25.76. HRMS (ESI) calcd for  $\text{C}_{24}\text{H}_{11}\text{F}_2\text{N}_6\text{O}_5$   $[\text{M} - \text{H}]^-$  501.0764, found 501.0778.

### Computational methods.

All calculations were performed by Gaussian 09 program package. To study the ground state and excited geometries and the electron transitions involved in the absorption and emission, density functional theory (DFT) and time-dependent (TD)DFT theoretical calculations on the molecules were conducted. Geometries of ground and excited states were optimized without symmetry restriction by adopting B3LYP functional with 6-31+G(d) basis set. The calculations of the excitation were performed by the TDDFT method at B3LYP/6-31+G(d) level. The solvent effect was considered for TDDFT calculations by SMD model in water.

### Determination of total biothiols in human urine by the Ellman method.

The total biothiols in human urine were measured by the Ellman method (UV-visible spectrophotometry). The thiols can react with 5,5'-dithiobis-(2-nitrobenzoic acid) (DTNB) to generate 2-nitro-5-thiobenzoic acid with yellow color and characteristic absorption peak at 412 nm, and the total thiol content can be quantitatively detected by the absorption changing. Briefly, the 5-fold diluted urine acted with or without DTNB were set as the sample group or the control group, the Cys solutions acted with or without DTNB were set as the standard group or the blank group. After incubation, absorbance at 412 nm of each group was determined via UV-Vis spectrophotometer, and the real absorbance was calculated using the following formulae:  $\Delta A_{\text{Sample}} = A_{\text{Sample}} - A_{\text{Control}}$ ,  $\Delta A_{\text{Standard}} = A_{\text{Standard}} - A_{\text{Blank}}$ . The linear correlations of Ellman method was constructed according to the standard group with the Cys concentration range from 0 to 300  $\mu\text{M}$ .

### Determination of H<sub>2</sub>S in human urine by WSP-5 probe.

The H<sub>2</sub>S in human urine were measured by the commercial H<sub>2</sub>S probe WSP-5. The probe can be degraded by H<sub>2</sub>S to yield fluorescein with strong fluorescence at 525 nm, and the H<sub>2</sub>S level can be quantitatively detected by the fluorescence intensity recovery. Briefly, the 5-fold diluted urine acted with or without WSP-5 were set as the sample group or the control group, the H<sub>2</sub>S solutions acted with or without WSP-5 were set as the standard group or the blank group. After incubation, fluorescence intensity at 525 nm of each group was determined via fluorescence spectrophotometer, and the real intensity was calculated using the following formulae:  $\Delta A_{\text{Sample}} = A_{\text{Sample}} - A_{\text{Control}}$ ,  $\Delta A_{\text{Standard}} = A_{\text{Standard}} - A_{\text{Blank}}$ . The linear correlations of WSP-5 was constructed according to the standard group with the H<sub>2</sub>S concentration range from 0 to 100  $\mu\text{M}$ .

### Cytotoxicity assay

The cell cytotoxicities of 2FDCI and NBD-2FDCI were measured by the CCK-8 assay. Generally, HepG2 cells were cultured in a 96-well plates at  $8 \times 10^3$  cells in 100  $\mu\text{L}$  culture medium per well and incubated at 37 °C overnight. Then the medium was replaced with medium composed of 2, 5, 10, and 20  $\mu\text{M}$  2FDCI and NBD-2FDCI. After a 24 h incubation time, the cells were added with CCK-8 (10  $\mu\text{L}$ ) for 3 h. Microplate reader was used to determine the absorbance at 490 nm of each well, and the cell viability was evaluated according to the following formula: Cell viability ratio (%) =  $(\text{OD}_{\text{Sample}} - \text{OD}_{\text{PBS}})/(\text{OD}_{\text{Blank}} - \text{OD}_{\text{PBS}}) \times 100\%$ .

### Reference

- [1] Q.-Z. Li, J. Gu, Y.-C. Chen, Organocatalytic asymmetric [4 + 2] formal cycloadditions of cyclohexenyldenemalononitriles and enals to construct chiral bicyclo[2.2.2]octane, *RSC Adv.* 4 (2014) 37522–37525. <https://doi.org/10.1039/C4RA07709A>
- [2] X. Zeng, Z. Chen, L. Tang, H. Yang, N. Liu, H. Zhou, Y. Li, J. Wu, Z. Deng, Y. Yu, H. Deng, X. Hong, Y. Xiao, A novel near-infrared fluorescent light-up probe for tumor imaging and drug-induced liver injury detection, *Chem. Commun.* 55 (2019) 2541–2544. <https://doi.org/10.1039/C8CC10286D>
- [3] X. Yang, Z. Cai, D. Li, D. Lei, Y. Li, G. Wang, J. Zhang, X. Dou, D- $\pi$ -A Dual-Mode Probe Design for the Detection of nM-Level Typical Oxidants, *Anal. Chem.* 94 (2022) 9184–9192. <https://doi.org/10.1021/acs.analchem.2c01894>

## 2. Supplementary figures

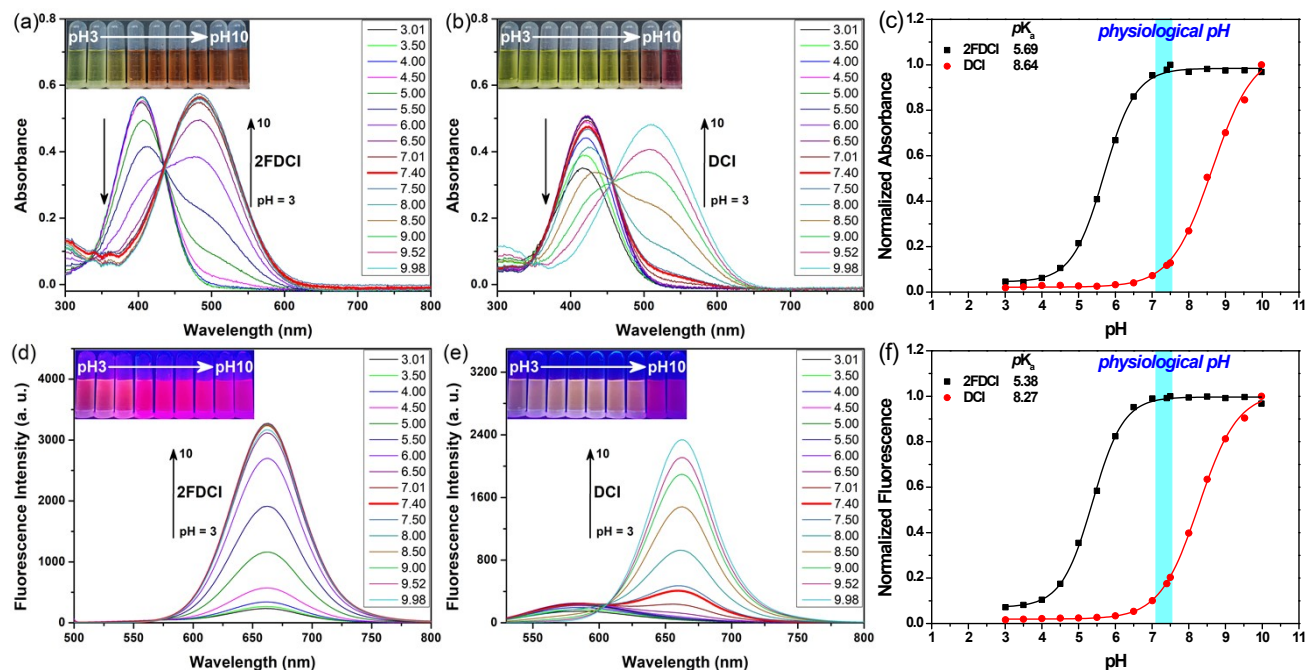

**Figure S1.** Absorption spectra of 20  $\mu\text{M}$  **2FDCI** (a) and **DCI** (b) in various pH conditions (50 mM PBS, 20% EtOH as a co-solvent), insert: color changes of **2FDCI** and **DCI** from pH 3 to 10. (c) Normalized absorption responses of **2FDCI** and **DCI** at 483 nm and 509 nm toward pH value. (d) and **DCI** (e) in various pH conditions (50 mM PBS, 20% EtOH as a co-solvent), insert: fluorescence photos under 365 nm UV light of **2FDCI** and **DCI** from pH 3 to 10. (f) Normalized Fluorescence responses of **2FDCI** and **DCI** at 661 nm and 662 nm toward pH value.

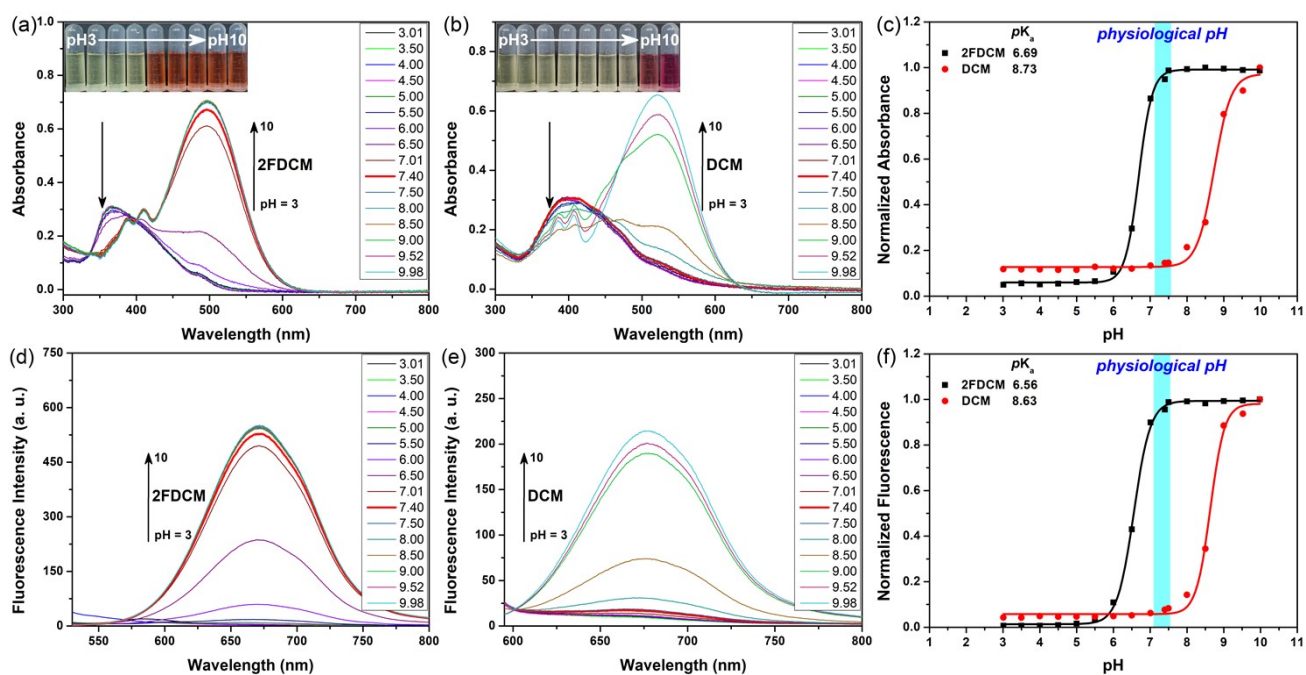

**Figure S2.** Absorption spectra of 20  $\mu\text{M}$  **2FDCM** (a) and **DCM** (b) in various pH conditions (50 mM PBS, 20% EtOH as a co-solvent), insert: color changes of **2FDCM** and **DCM** from pH 3 to 10. (c) Absorption responses of **2FDCM** at 497 nm and **DCM** at 523 nm toward pH value. Fluorescence spectra of 20  $\mu\text{M}$  **2FDCM** (d) and **DCM** (e) in various pH conditions (50 mM PBS, 20% EtOH as a co-solvent). (f) Fluorescence responses of **2FDCM** at 671 nm and **DCM** at 676 nm toward pH value.

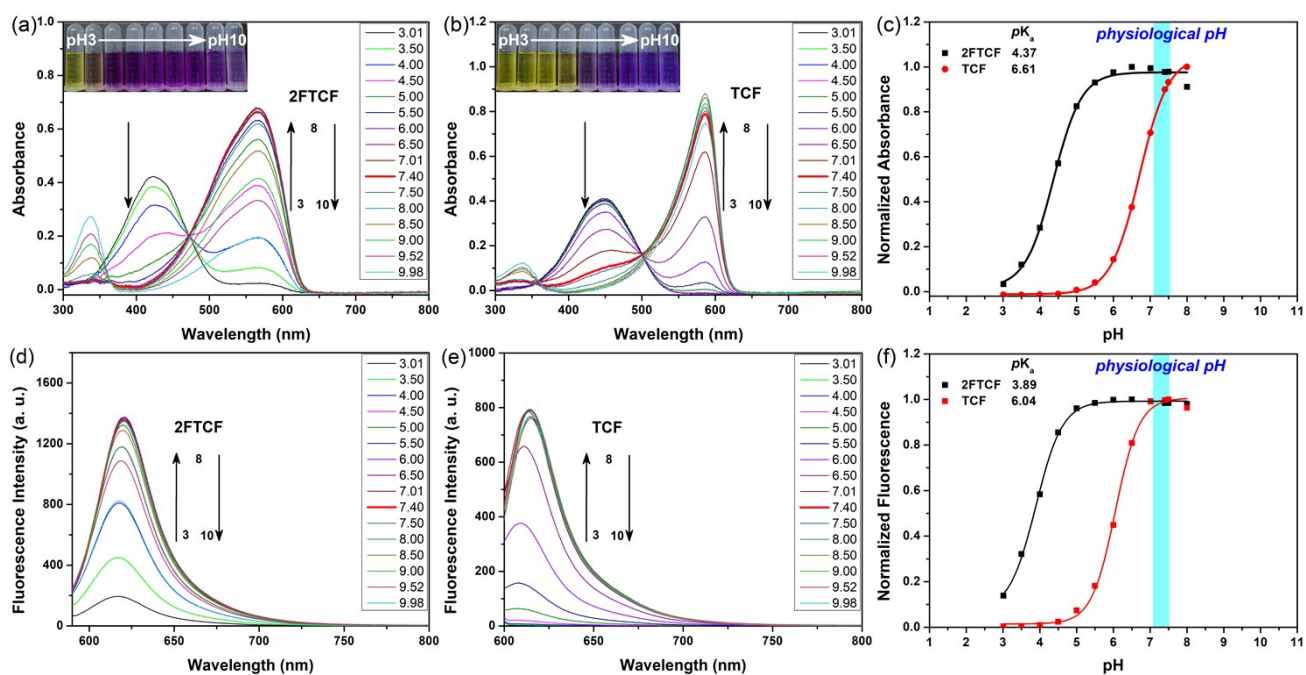

**Figure S3.** Absorption spectra of 20  $\mu\text{M}$  **2FTCF** (a) and **TCF** (b) in various pH conditions (50 mM PBS, 20% EtOH as a co-solvent), insert: color changes of **2FTCF** and **TCF** from pH 3 to 10. (c) Absorption responses of **2FTCF** at 567 nm and **TCF** at 586 nm toward pH value. Fluorescence spectra of 20  $\mu\text{M}$  **2FTCF** (d) and **TCF** (e) in various pH conditions (50 mM PBS, 20% EtOH as a co-solvent). (f) Fluorescence responses of **2FTCF** at 620 nm and **TCF** at 614 nm toward pH value.



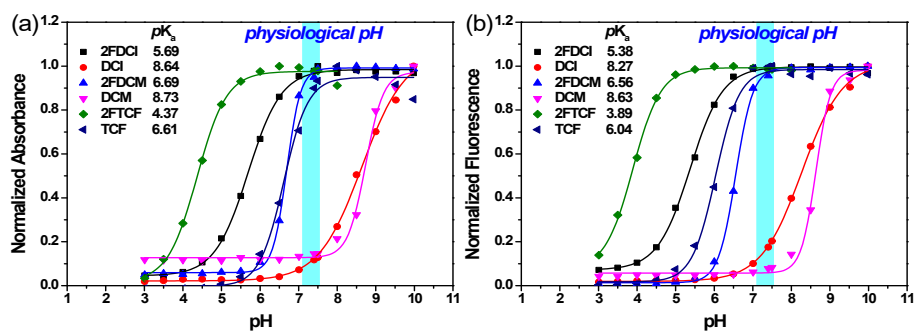

**Figure S4.** (a) Normalized absorption responses of **2FDCI**, **DCI**, **2FDCM**, **DCM**, **2FTCF**, and **TCF** at 483 nm, 509 nm, 497 nm, 523 nm, 567 nm, and 586 nm toward pH value, respectively. (b) Normalized fluorescence responses of **2FDCI**, **DCI**, **2FDCM**, **DCM**, **2FTCF**, and **TCF**, at 661 nm, 662 nm, 671 nm, 676 nm, 620 nm, and 614 nm toward pH value, respectively.

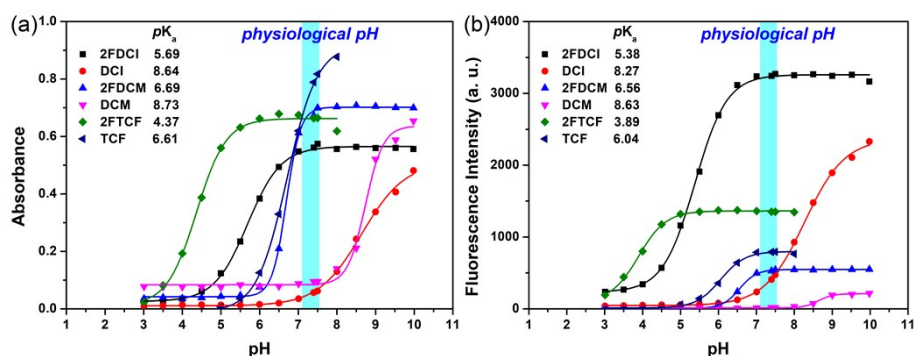

**Figure S5.** (a) Absorption responses of **2FDCI**, **DCI**, **2FDCM**, **DCM**, **2FTCF**, and **TCF**, at 483 nm, 509 nm, 497 nm, 523 nm, 567 nm, and 586 nm toward pH value, respectively. (b) Fluorescence responses of **2FDCI**, **DCI**, **2FDCM**, **DCM**, **2FTCF**, and **TCF**, at 661 nm, 662 nm, 671 nm, 676 nm, 620 nm, and 614 nm toward pH value, respectively.

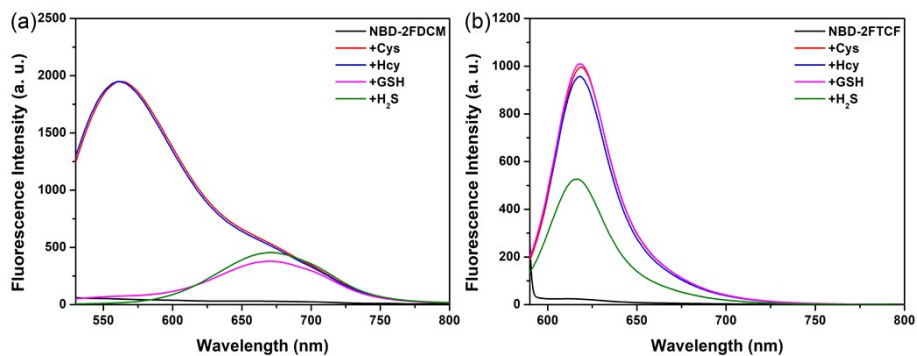

**Figure S6.** Fluorescence spectra of **NBD-2FDCM** (a) and **NBD-2FTCF** (b) in response to Cys, Hcy, GSH, and H<sub>2</sub>S under excitation of 500 nm and 570 nm.

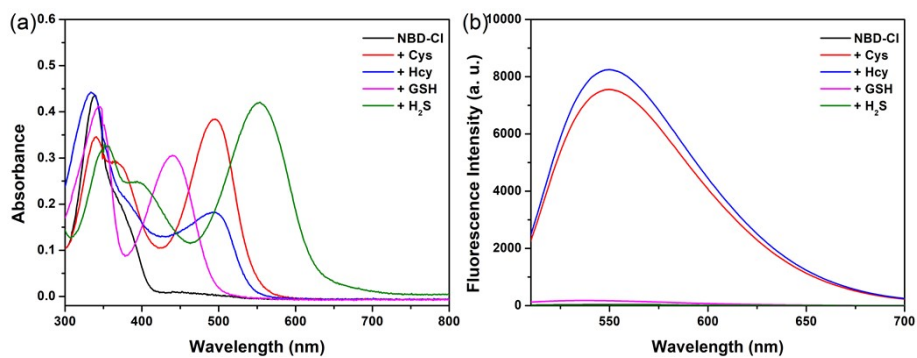

**Figure S7.** Absorption spectra of 15  $\mu$ M **NBD-2FDCI** (a), **NBD-2FDCM** (c), and **NBD-2FTCF** (e) in response to Cys, Hcy, GSH, and H<sub>2</sub>S, insert: color changes of **probes** in the present of analytes. Fluorescence spectra of 15  $\mu$ M **NBD-2FDCI** (b), **NBD-2FDCM** (d), and **NBD-2FTCF** (f) in response to Cys, Hcy, GSH, and H<sub>2</sub>S under excitation of 480 nm.

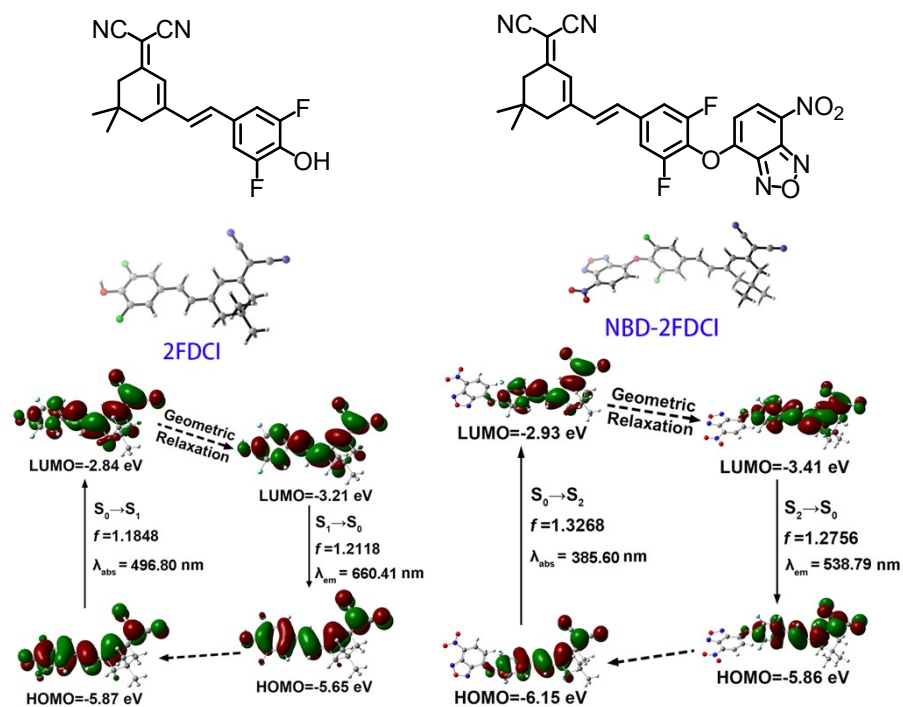

**Figure S8.** The HOMO and LUMO orbital energy of 2FDCI and NBD-2FDCI using Gaussian 09 program package.

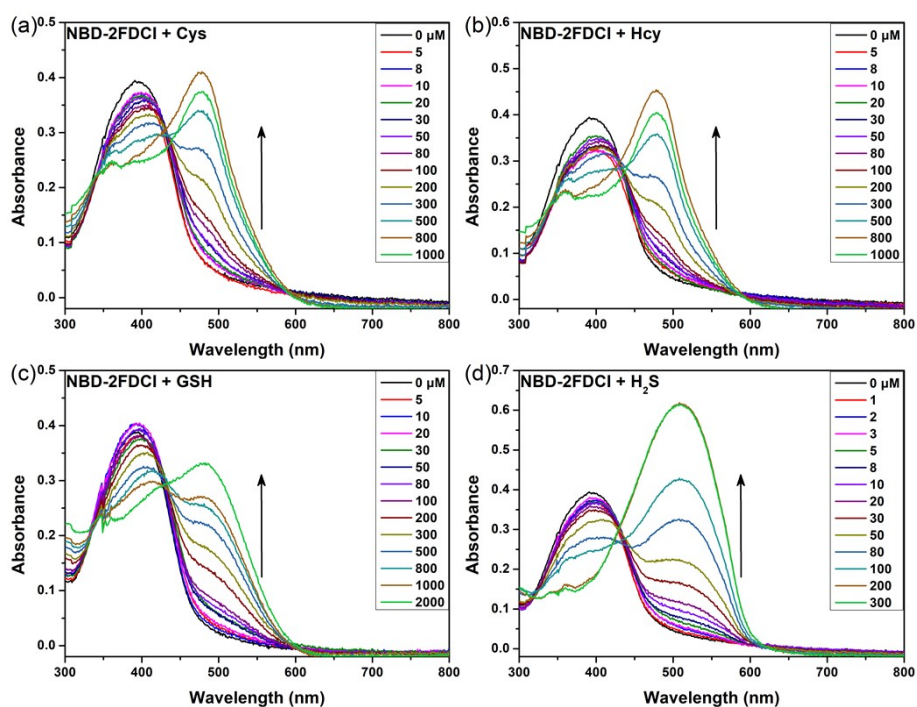

**Figure S9.** Absorption spectra of 15  $\mu\text{M}$  NBD-2FDCI in response to Cys (a), Hcy (b), GSH (c), and  $\text{H}_2\text{S}$  (d) with concentrations of 5-1000  $\mu\text{M}$ , 5-1000  $\mu\text{M}$ , 5-2000  $\mu\text{M}$ , and 1-300  $\mu\text{M}$ , respectively.

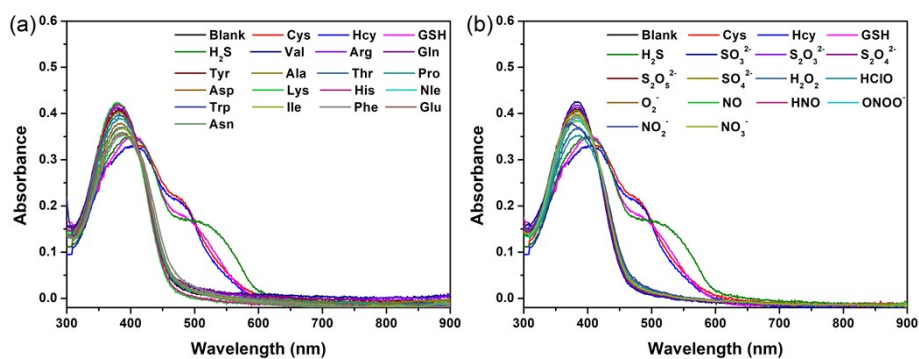

**Figure S10.** Absorption spectra of 15  $\mu\text{M}$  NBD-2FDCI to 200  $\mu\text{M}$  Cys, 200  $\mu\text{M}$  Hcy, 300  $\mu\text{M}$  GSH, and 30  $\mu\text{M}$   $\text{H}_2\text{S}$ , other common amino acid (a), or reactive species (b).

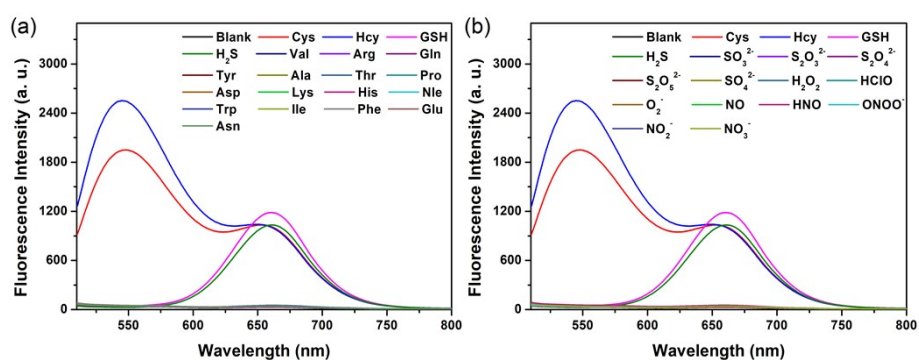

**Figure S11.** Fluorescence spectra of 15  $\mu\text{M}$  NBD-2FDCI to 200  $\mu\text{M}$  Cys, 200  $\mu\text{M}$  Hcy, 300  $\mu\text{M}$  GSH, and 30  $\mu\text{M}$   $\text{H}_2\text{S}$ , other common amino acid (a), or reactive species (b).

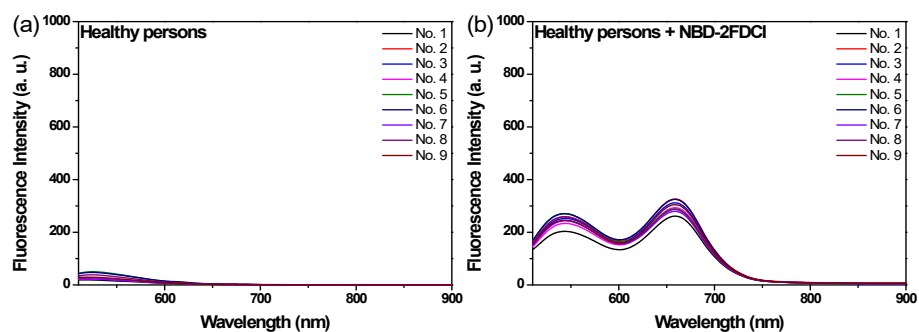

**Figure S12.** (a) Intrinsic fluorescence of 5-fold diluted human urine samples from healthy persons. (b) Fluorescence response results of probe NBD-2FDCI incubated with the urine samples in (a).

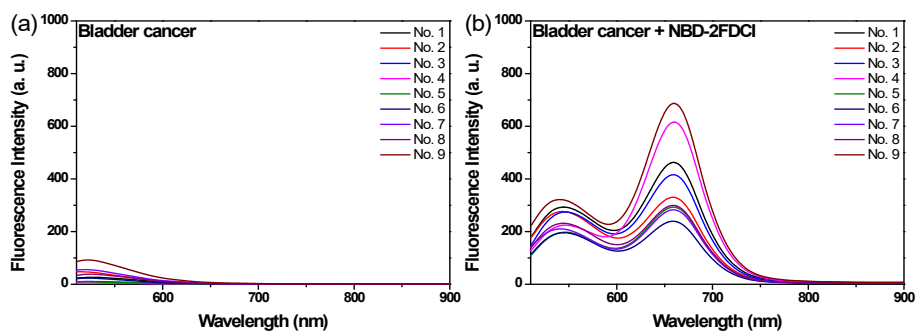

**Figure S13.** (a) Intrinsic fluorescence of 5-fold diluted human urine samples from bladder cancer patients. (b) Fluorescence response results of probe probe NBD-2FDCI incubated with the urine samples in (a).

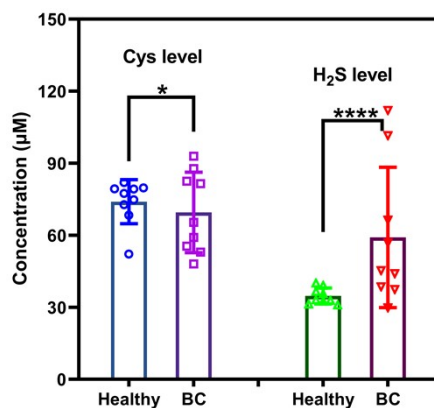

**Figure S14.** Quantification of Cys and H<sub>2</sub>S with probe NBD-2FDCI in tris(2-carboxyethyl)phosphine (TCEP, a reducing agent) pretreated human urine samples of healthy persons and BC patients. Data denote mean  $\pm$  s.d. (\* $P < 0.05$ , \*\*\*\* $P < 0.0001$ ).

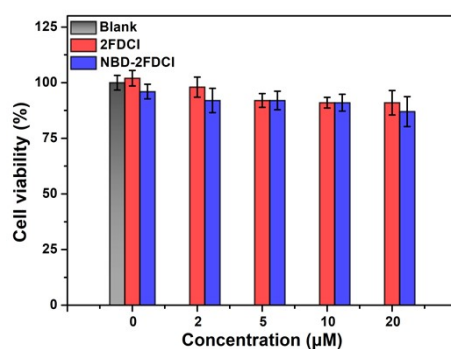

**Figure S15.** Cell viabilities of HepG2 cells treated with different concentrations of 2FDCI and probe NBD-2FDCI for 24 hours.

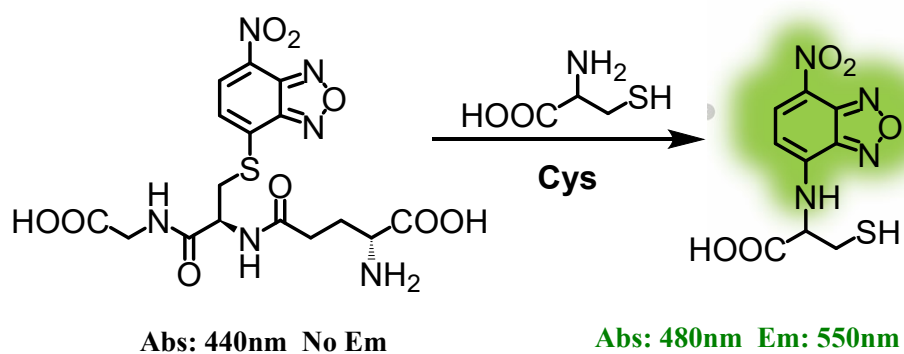

**Scheme S2.** Proposed response mechanism of the conversion of NBD-GSH to NBD-Cys in living cells.

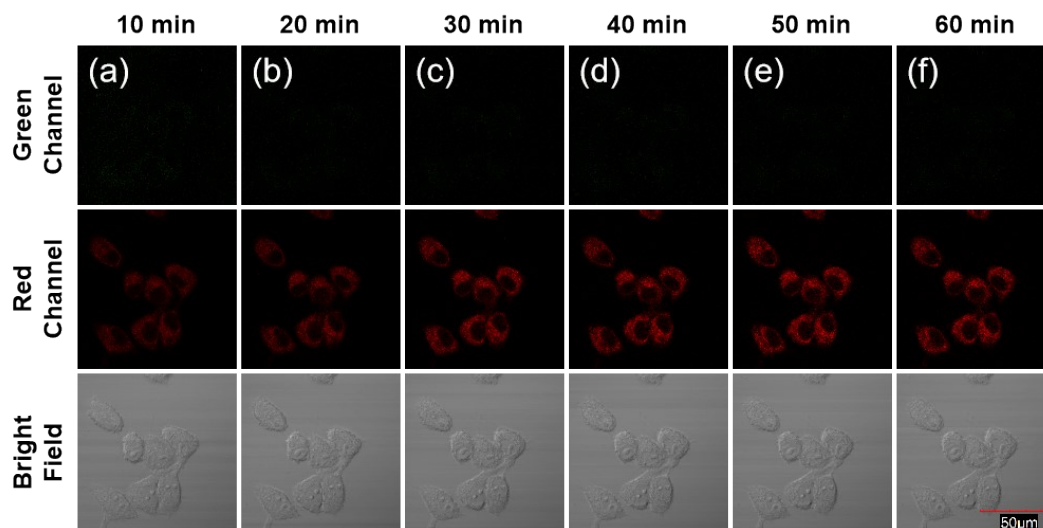

**Figure S16.** Time dependent fluorescence imaging of 500  $\mu$ M GSH in 500  $\mu$ M NEM pretreated HepG2 cells by 10  $\mu$ M probe NBD-2FDCI staining. Excitation wavelength of 488 nm for both green channel (520-580 nm) and red channel (650-700 nm). Scale bars: 50  $\mu$ m.

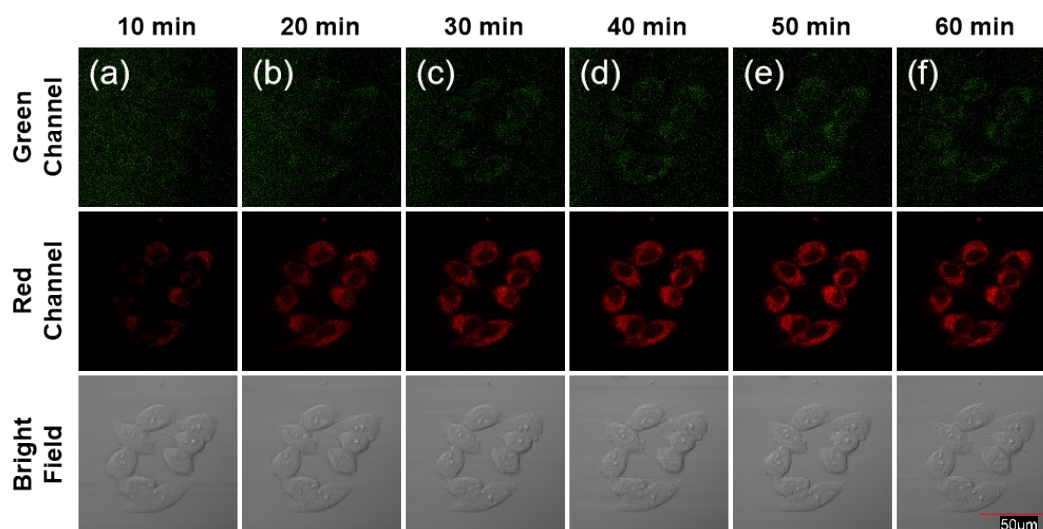

**Figure S17.** Time dependent fluorescence imaging of 200  $\mu\text{M}$  Cys in 500  $\mu\text{M}$  NEM pretreated HepG2 cells by 10  $\mu\text{M}$  probe **NBD-2FDCI** staining. Excitation wavelength of 488 nm for both green channel (520-580 nm) and red channel (650-700 nm). Scale bars: 50  $\mu\text{m}$ .

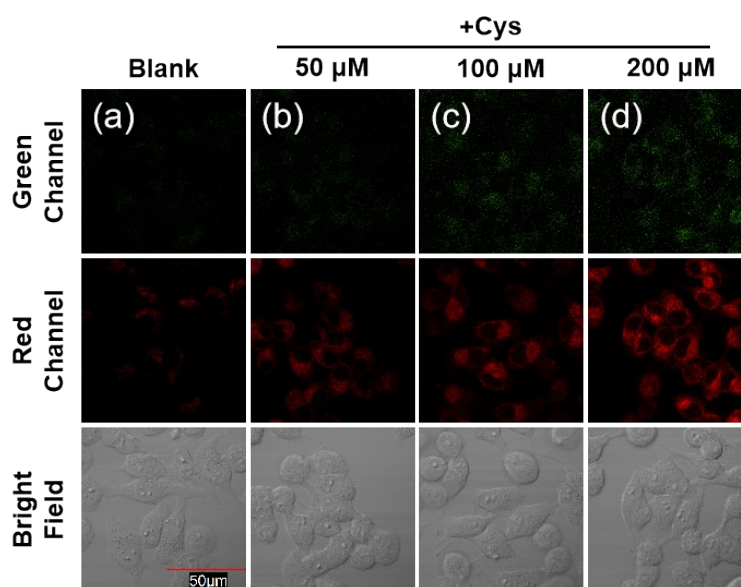

**Figure S18.** Fluorescence imaging of 50, 100, and 200  $\mu\text{M}$  Cys in 500  $\mu\text{M}$  NEM pretreated HepG2 cells by 10  $\mu\text{M}$  probe **NBD-2FDCI** staining. Excitation wavelength of 488 nm for both green channel (520-580 nm) and red channel (650-700 nm). Scale bars: 50  $\mu\text{m}$ .

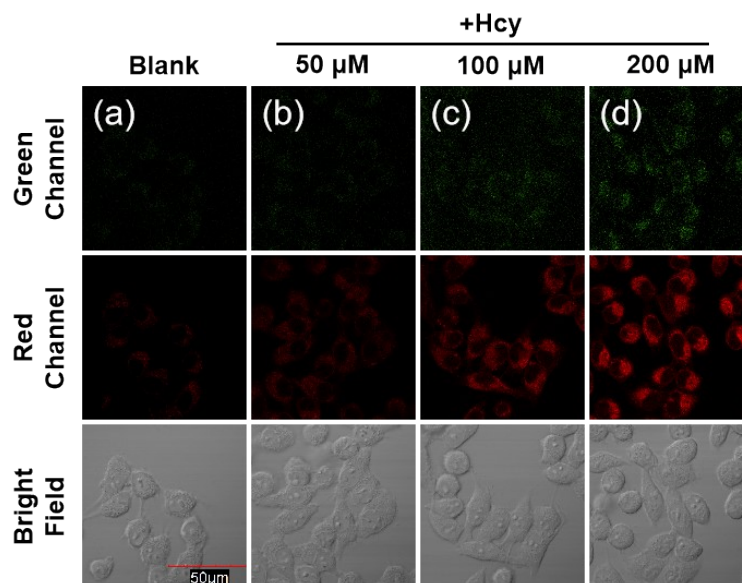

**Figure S19.** Fluorescence imaging of 50, 100, and 200  $\mu\text{M}$  Hcy in 500  $\mu\text{M}$  NEM pretreated HepG2 cells by 10  $\mu\text{M}$  probe **NBD-2FDCI** staining. Excitation wavelength of 488 nm for both green channel (520-580 nm) and red channel (650-700 nm). Scale bars: 50  $\mu\text{m}$ .

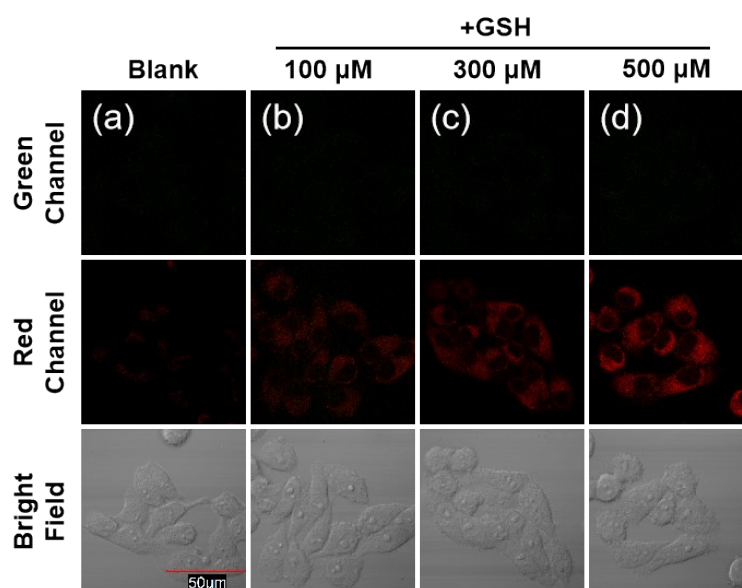

**Figure S20.** Fluorescence imaging of 100, 300, and 500  $\mu\text{M}$  GSH in 500  $\mu\text{M}$  NEM pretreated HepG2 cells by 10  $\mu\text{M}$  probe **NBD-2FDCI** staining. Excitation wavelength of 488 nm for both green channel (520-580 nm) and red channel (650-700 nm). Scale bars: 50  $\mu\text{m}$ .



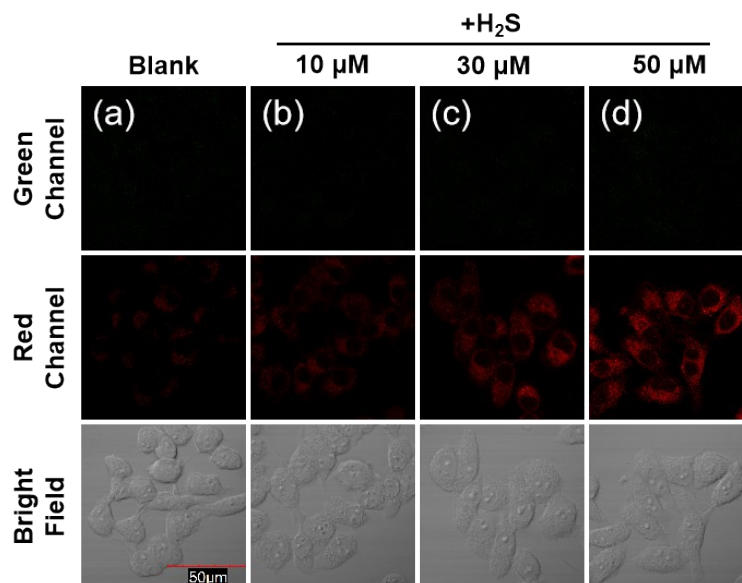

**Figure S21.** Fluorescence imaging of 10, 30, and 50  $\mu$ M H<sub>2</sub>S in 500  $\mu$ M NEM pretreated HepG2 cells by 10  $\mu$ M probe **NBD-2FDCI** staining. Excitation wavelength of 488 nm for both green channel (520-580 nm) and red channel (650-700 nm). Scale bars: 50  $\mu$ m.

**Table S1.** Reported probes for biothiols and H<sub>2</sub>S.

| Probe                                                                                      | Analyte | $\lambda_{\text{abs}}/\lambda_{\text{em}}$<br>(nm) | LOD                | Linear range        | Response time | Enhancement | Applications                                                                     |
|--------------------------------------------------------------------------------------------|---------|----------------------------------------------------|--------------------|---------------------|---------------|-------------|----------------------------------------------------------------------------------|
| 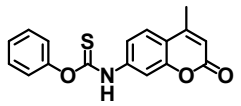<br>[1]   | Cys     | 340/443                                            | 0.16 $\mu\text{M}$ | 0-35 $\mu\text{M}$  | 14 min        | 25-fold     | Imaging in PC12 cells and living mouse brain                                     |
| <br>[2]   | Cys     | 460/515                                            | 0.18 $\mu\text{M}$ | 0-100 $\mu\text{M}$ | 30 min        | 35-fold     | Imaging in A549 cells                                                            |
| <br>[3]   | Cys     | 660/851                                            | 10.6 nM            | 0-8 $\mu\text{M}$   | 3 min         | -           | Fluorescent and Photoacoustic imaging in LO2 and HepG2 cells, tumor bearing mice |
| <br>[4]  | Cys     | 645/760                                            | 0.07 $\mu\text{M}$ | 3-100 $\mu\text{M}$ | 30 min        | -           | Fluorescent and Photoacoustic imaging in cells, tumor bearing mice               |
| <br>[5] | GSH     | 410/510 to<br>350/460                              | 245 nM             | 0-6 mM              | -             | -           | Imaging of GSH dynamics in the nucleoli in the cell cycle process                |

|                                                                                             |     |                       |           |         |        |         |                                                                               |
|---------------------------------------------------------------------------------------------|-----|-----------------------|-----------|---------|--------|---------|-------------------------------------------------------------------------------|
| 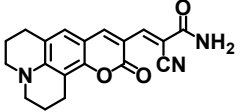<br>[6]    | GSH | 530/587 to<br>420/505 | -         | -       | 10 s   | -       | Quantitative and real-time<br>imaging in living cells                         |
| <br>[7]    | GSH | 594/613 to<br>527/544 | -         | -       | -      | -       | Real-time quantitative imaging<br>of GSH fluctuation in living<br>cells       |
| <br>[8]    | GSH | 892/928               | 80 nM     | 0-20 μM | 60 min | 16-fold | NIR-II imaging in living cells<br>and tumor bearing mice                      |
| <br>[9]    | GSH | 710/736               | -         | -       | -      | -       | Ratiometric quantitative and<br>real-time imaging in living cells<br>and mice |
| <br>[10]  | GSH | -                     | -         | -       | -      | -       | Quantification of redox<br>potential and GSH<br>concentration                 |
| <br>[11] | Hcy | 488/550               | 0.084 ppm | -       | 5 min  | -       | Monitoring Hcy level in plasma<br>from the GBM-xenograft<br>mouse model       |

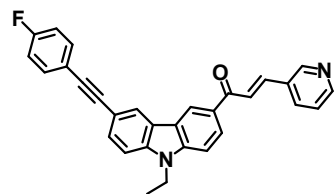

[12]

Hcy

345/456

18 nM

0-10  $\mu$ M

60 min

-

Monitoring Hcy level in serum, living cells, and atherosclerosis model mice

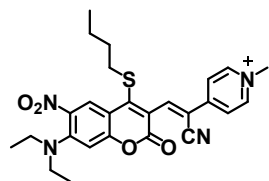

[13]

Hcy

568/654

3.7 nM

0-8  $\mu$ M

30 min

357-fold

Monitoring Hcy in type 2 diabetes mellitus and Alzheimer's disease

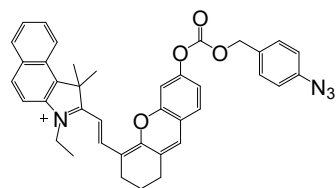

[14]

H<sub>2</sub>S

716/736

20 nM

0-40  $\mu$ M

30 min

-

Image H<sub>2</sub>S in mitochondria of MCF-7 cells and living nude mice

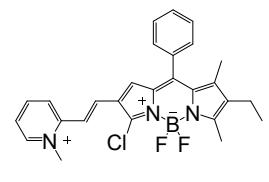

[15]

H<sub>2</sub>S

644/718

60 nM

0-30  $\mu$ M

1200 s

28-fold

Visualize and differentiate of cancers

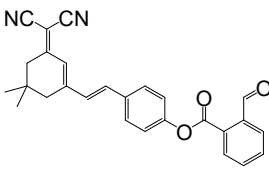

[16]

H<sub>2</sub>S

500/650

39.1 nM

0-40  $\mu$ M

12 min

-

Visualize exogenous/endogenous H<sub>2</sub>S in HeLa cells and zebrafish

|                                                                                                 |                   |         |                               |                                |                        |           |                                                                                                                                   |
|-------------------------------------------------------------------------------------------------|-------------------|---------|-------------------------------|--------------------------------|------------------------|-----------|-----------------------------------------------------------------------------------------------------------------------------------|
| 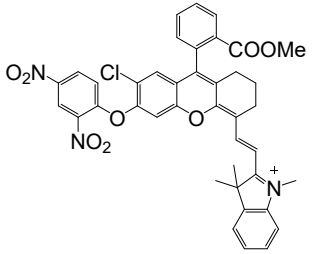 <p>[17]</p>   | H <sub>2</sub> S  | 698/729 | 0.51 μM                       | 0-100 μM                       | -                      | 13.5-fold | Monitor of hepatic H <sub>2</sub> S levels in the pathological progression of nonalcoholic fatty liver disease                    |
|  <p>[18]</p>   | H <sub>2</sub> S  | 450/670 | 1.3 nM                        | 1-80 μM                        | 40 min                 | 25-fold   | H <sub>2</sub> S triggered and H <sub>2</sub> S releasing fluorescent probe did not interfere with the progression of ferroptosis |
|  <p>[19]</p>   | Cys<br>Hcy        | 425/495 | 49 nM<br>51 nM                | 0-10 μM                        | 3 min                  |           | Imaging in cells and mouse liver slice                                                                                            |
|  <p>[20]</p>  | Cys<br>Hcy<br>GSH | 537/675 | 68 nM<br>69 nM<br>52 nM       | 0-60 μM                        | 150 s<br>250 s<br>140s | 36-fold   | Revealing the negative relationship between the level of thiols and the occurrence of epilepsy                                    |
|  <p>[21]</p> | Cys<br>Hcy<br>GSH | 458/528 | 78.8 nM<br>90.5 nM<br>86.4 nM | 0-4.5 μM<br>0-4.5 μM<br>0-5 μM | 60 s                   | 180-fold  | Imaging in cells and mouse tissues                                                                                                |

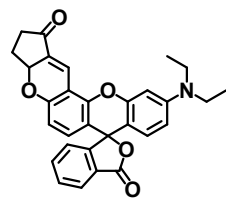

[22]

|     |         |       |              |      |         |  |                                |
|-----|---------|-------|--------------|------|---------|--|--------------------------------|
| Cys |         | 70 nM |              |      |         |  | Imaging in HeLa cells and      |
| Hcy | 494/557 | 49 nM | 0-10 $\mu$ M | 10 s | 82-fold |  | labeling sulfhydryl-containing |
| GSH |         | 62 nM |              |      |         |  | proteins                       |

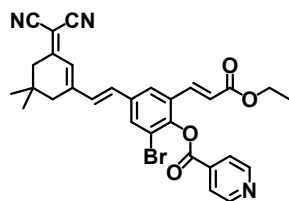

[23]

|     |         |       |              |        |         |  |                                 |
|-----|---------|-------|--------------|--------|---------|--|---------------------------------|
| Cys |         | 27 nM |              | 9 min  | 65-fold |  | Imaging changes of biothiols in |
| Hcy | 541/713 | 74 nM | 0-20 $\mu$ M | 27 min | 49-fold |  | vivo in the brains of mice      |
| GSH |         | 55 nM |              | 20 min | 57-fold |  | during CIRI                     |

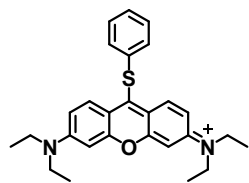

[24]

|     |            |       |              |        |          |  |                               |
|-----|------------|-------|--------------|--------|----------|--|-------------------------------|
| Cys | 580/620 to | 22 nM | 2-8 $\mu$ M  | 5 min  | 163-fold |  | Visualizing mitochondrial     |
| Hcy | 445/540    | 23 nM | 4-12 $\mu$ M | 10 min | 125-fold |  | biothiols in living cells and |
|     |            |       |              |        |          |  | Daphnia magna model           |

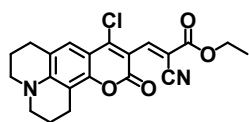

[25]

|     |         |        |              |        |          |  |                                |
|-----|---------|--------|--------------|--------|----------|--|--------------------------------|
| Cys | 397/503 | 0.2 nM | 0-30 $\mu$ M |        | 740-fold |  | Visualizing endogenous Hcy,    |
| Hcy | 375/467 | 0.7 nM | 0-30 $\mu$ M | 15 min | 457-fold |  | Cys, GSH, and their            |
| GSH | 500/568 | 1 nM   | 0-10 $\mu$ M |        | 115-fold |  | transformation in living cells |

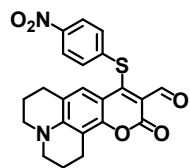

[26]

|     |         |        |              |        |          |  |                                   |
|-----|---------|--------|--------------|--------|----------|--|-----------------------------------|
| Cys | 396/495 | 106 nM | 0-30 $\mu$ M | 25 min | 119-fold |  | Discrimination of different       |
| Hcy | 396/495 | 82 nM  | 0-30 $\mu$ M | 25 min | 130-fold |  | biothiols in cells and zebra fish |
| GSH | 505/565 | 57 nM  | 0-15 $\mu$ M | 20 min | 288-fold |  |                                   |

## References for Table S1

- [1] Y. Zhang, X. Wang, X. Bai, P. Li, D. Su, W. Zhang, W. Zhang, B. Tang, Highly Specific Cys Fluorescence Probe for Living Mouse Brain Imaging via Evading Reaction with Other Biothiols, *Anal. Chem.* 91 (2019) 8591–8594. <https://doi.org/10.1021/acs.analchem.9b01878>
- [2] E. Karakuş, M. Sayar, S. Dartar, B.U. Kaya, M. Emrulloğlu, Fluorescein propiolate: a propiolate-decorated fluorescent probe with remarkable selectivity towards cysteine, *Chem. Commun.* 55 (2019) 4937–4940. <https://doi.org/10.1039/C9CC01774G>
- [3] Z. Chen, B. Wang, Y. Liang, L. Shi, X. Cen, L. Zheng, E. Liang, L. Huang, K. Cheng, Near-Infrared Fluorescent and Photoacoustic Dual-Mode Probe for Highly

- Sensitive and Selective Imaging of Cysteine In Vivo, *Anal. Chem.* 94 (2022) 10737–10744. <https://doi.org/10.1021/acs.analchem.2c01372>
- [4] Q.-S. Gu, Z.-C. Yang, J.-J. Chao, L. Li, G.-J. Mao, F. Xu, C.-Y. Li, Tumor-Targeting Probe for Dual-Modal Imaging of Cysteine In Vivo, *Anal. Chem.* 95 (2023) 12478–12486. <https://doi.org/10.1021/acs.analchem.3c02134>
- [5] S. Khatun, S. Yang, Y.Q. Zhao, Y. Lu, A. Podder, Y. Zhou, S. Bhuniya, Highly Chemoselective Self-Calibrated Fluorescent Probe Monitors Glutathione Dynamics in Nucleolus in Live Cells, *Anal. Chem.* 92 (2020) 10989–10995. <https://doi.org/10.1021/acs.analchem.9b05175>
- [6] M. Tian, X.-Y. Liu, H. He, X.-Z. Ma, L.C. iang, Y. Liu, F.-L. Jiang, Real-Time Imaging of Intracellular Glutathione Levels Based on a Ratiometric Fluorescent Probe with Extremely Fast Response, *Anal. Chem.* 2020, 92, 10068–10075. <https://doi.org/10.1021/acs.analchem.0c01881>
- [7] H. Liu, W. Song, S. Zhang, K.S. Chan, Z. Guo, Z. Shen, A ratiometric fluorescent probe for real-time monitoring of intracellular glutathione fluctuations in response to cisplatin, *Chem. Sci.* 11 (2020) 8495–8501. <https://doi.org/10.1039/D0SC02889D>
- [8] Y. Pan, S. Lei, J. Zhang, J. Qu, P. Huang, J. Lin, Activatable NIR-II Fluorescence Probe for Highly Sensitive and Selective Visualization of Glutathione In Vivo, *Anal. Chem.* 93 (2021) 17103–17109. <https://doi.org/10.1021/acs.analchem.1c04504>
- [9] N. Li, T. Wang, N. Wang, M. Fan, X. Cui, A Substituted-Rhodamine-Based Reversible Fluorescent Probe for In Vivo Quantification of Glutathione, *Angew. Chem. Int. Ed.* 62 (2022) e202217326. <https://doi.org/10.1002/anie.202217326>
- [10] S. Emmert, G. Quargnali, S. Thallmair, P. Rivera-Fuentes, A locally activatable sensor for robust quantification of organellar glutathione, *Nat. Chem.* 15 (2023) 1415–1421. <https://doi.org/10.1038/s41557-023-01249-3>
- [11] Y. Kim, J.M. An, J. Kim, T. Chowdhury, H.J. Yu, K.-M. Kim, H. Kang, C.-K. Park, J. F. Joung, S. Park, D. Kim, Pyridine-NBD: A homocysteine-selective fluorescent probe for glioblastoma (GBM) diagnosis based on a blood test, *Anal. Chim. Acta* 1202 (2022) 339678. <https://doi.org/10.1016/j.aca.2022.339678>
- [12] F. Wei, Y. Ding, J. Ou, CX. hen, L. Li, Q. Zhou, Q. Chen, Q. Wang, Y. Feng, X. Meng, Accurate Detection of Hcy in Human Serum and Two-Photon Visualization of Atherosclerosis Using a Highly Specific Fluorescent Probe, *Anal. Chem.* 95 (2023) 9173–9181. <https://doi.org/10.1021/acs.analchem.2c05441>
- [13] T. Zhou, Y. Yang, K. Zhou, M. Jin, M. Han, W. Li, C. Yin, Efficiently mitochondrial targeting fluorescent imaging of H<sub>2</sub>S in vivo based on a conjugate-lengthened cyanine NIR fluorescent probe, *Actuat. B-Chem.* 301 (2019) 127116. <https://doi.org/10.1016/j.snb.2019.127116>.
- [14] R. Wang, X. Gu, Q. Li, J. Gao, B. Shi, G. Xu, T. Zhu, H. Tian, C. Zhao, Aggregation Enhanced Responsiveness of Rationally Designed Probes to Hydrogen Sulfide for Targeted Cancer Imaging, *J. Am. Chem. Soc.* 142 (2020) 15084–15090. <https://dx.doi.org/10.1021/jacs.0c06533>.
- [15] W. Shu, S. Zang, C. Wang, M. Gao, J. Jing, X. Zhang, An Endoplasmic Reticulum-Targeted Ratiometric Fluorescent Probe for the Sensing of Hydrogen Sulfide in Living Cells and Zebrafish, *Anal. Chem.* 92 (2020) 9982–9988. <https://dx.doi.org/10.1021/acs.analchem.0c01623>.
- [16] W. Li, Y. Shen, X. Gong, X.-B. Zhang, L. Yuan, Highly Selective Fluorescent Probe Design for Visualizing Hepatic Hydrogen Sulfide in the Pathological Progression of Nonalcoholic Fatty Liver, *Anal. Chem.* 93 (2021) 16673–16682. <https://doi.org/10.1021/acs.analchem.1c04246>.
- [17] T. Liang, T. Qiang, L. Ren, F. Cheng, B. Wang, M. Li, W. Hu, T.D. James, Near-infrared fluorescent probe for hydrogen sulfide: high-fidelity ferroptosis

- evaluation in vivo during stroke, *Chem. Sci.* 13 (2022) 2992–3001. <https://doi.org/10.1039/D1SC05930K>.
- [18] G. Yin, Y. Gan, H. Jiang, T. Yu, M. Liu, Y. Zhang, H. Li, P. Yin, S. Yao, General Strategy for Specific Fluorescence Imaging of Homocysteine in Living Cells and In Vivo, *Anal. Chem.* 95 (2023) 8932–8938. <https://doi.org/10.1021/acs.analchem.3c00799>
- [19] T. Cheng, W. Huang, D. Gao, Z. Yang, C. Zhang, H. Zhang, J. Zhang, H. Li, X.-F. Yang, Michael Addition/S,N-Intramolecular Rearrangement Sequence Enables Selective Fluorescence Detection of Cysteine and Homocysteine, *Anal. Chem.* 91 (2019) 10894–10900. <https://doi.org/10.1021/acs.analchem.9b02814>
- [20] Y. Yang, Y. Zhang, M. Ma, H. Liu, K. Ge, C. Zhang, M. Jin, D. Liu, W. ang, C. Yin, J. Zhang, Synergistic Modulation by Halogens and Pyridine Crossing the Blood-Brain Barrier for InSitu Visualization of Thiol Flux in the Epileptic Brain, *Anal. Chem.* 94 (2022) 14443–14452. <https://doi.org/10.1021/acs.analchem.2c03390>
- [21] Y. Zhang, N. Zhang, S. Wang, Q. Zan, X. Wang, Q. Yang, X. Yu, C. Dong, L. Fan, A lipid droplet-targetable and biothiol-sensitive fluorescent probe for the diagnosis of cancer cells/tissues, *Analyst* 147 (2022) 1695–1701. <https://doi.org/10.1039/D2AN00030J>
- [22] S. Zheng, J. Peng, L. Jiang, H. Gu, F. Wang, C. Wang, S. Lu, C. Chen, A rhodol-derived probe for intracellular biothiols imaging and rapid labelling of sulfhydryl-containing proteins, *Sens. Actuators B: Chem.* 367 (2022) 132148. <https://doi.org/10.1016/j.snb.2022.132148>
- [23] Y. Yang, M. Ma, L. Shen, J. An, E. Kim, H. Liu, M. Jin, S. Wang, J. Zhang, J. S. Kim, C. Yin, A Fluorescent Probe for Investigating the Role of Biothiols in Signaling Pathways Associated with Cerebral Ischemia-Reperfusion Injury, *Angew. Chem.Int. Ed.* 62 (2023) e202310408. <https://doi.org/10.1002/anie.202310408>
- [24] M. Yang, J. Fan, W. Sun, J. Du, X. Peng, Mitochondria-Anchored Colorimetric and Ratiometric Fluorescent Chemosensor for Visualizing Cysteine/Homocysteine in Living Cells and *Daphnia magna* Model, *Anal. Chem.* 91 (2019) 12531–12537. <https://doi.org/10.1021/acs.analchem.9b03386>
- [25] G. Yin, T. Niu, T. Yu, Y. Gan, X. Sun, P. Yin, H. Chen, Y. Zhang, H. Li, S. Yao, Simultaneous Visualization of Endogenous Homocysteine, Cysteine, Glutathione, and their Transformation through Different Fluorescence Channels, *Angew. Chem.Int. Ed.* 58 (2019) 4557–4561. <https://doi.org/10.1002/anie.201813935>
- [26] X.-B. Wang, H.-J. Li, C. Liu, Y.-X. Hu, M.-C. Li, Y.-C. Wu, Simple Turn-On Fluorescent Sensor for Discriminating Cys/Hcy and GSH from Different Fluorescent Signals, *Anal. Chem.* 93 (2021) 2244–2253. <https://doi.org/10.1021/acs.analchem.0c04100>



**Table S2.** Comparison of reported nitro-1,2,3-benzoxadiazole modified probes and the present probe NBD-2FDCI.

| Probe                                                                                      | Analyte          | $\lambda_{ex}/\lambda_{em}$ (nm) | LOD           | Linear range  | Response time | Enhancement | Applications                                                                      |
|--------------------------------------------------------------------------------------------|------------------|----------------------------------|---------------|---------------|---------------|-------------|-----------------------------------------------------------------------------------|
| 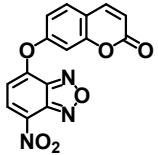<br>[1]   | Cys              | 330/480                          | 0.024 $\mu$ M | 0-10 $\mu$ M  | -             | 86-fold     | Imaging in HeLa cells                                                             |
|                                                                                            |                  | 460/580                          | 0.020 $\mu$ M | 0-80 $\mu$ M  |               | 508-fold    |                                                                                   |
|                                                                                            | Hcy              | 330/480                          | 0.142 $\mu$ M | 0-30 $\mu$ M  | -             | 90-fold     |                                                                                   |
|                                                                                            |                  | 460/580                          | 0.010 $\mu$ M | 0-25 $\mu$ M  |               | 580-fold    |                                                                                   |
| <br>[2]   | GSH              | 330/480                          | 0.018 $\mu$ M | 0-6 $\mu$ M   | -             | 92-fold     | Fast imaging of H <sub>2</sub> S in living cells and different fresh tissues      |
|                                                                                            | H <sub>2</sub> S | 450/490                          | 0.12 $\mu$ M  | 0-20 $\mu$ M  | 2 min         | 125-fold    |                                                                                   |
| <br>[3]  | Cys              | 475/525                          | 11.4 nM       | 0-10 $\mu$ M  | 15 min        | -           | Distinguishing between tumor cells and normal cells, high toxicity to tumor cells |
|                                                                                            | Hcy              | 475/525                          | 16.8 nM       | 0-10 $\mu$ M  | 30 min        | -           |                                                                                   |
|                                                                                            | GSH              | 425/545                          | 145.4 nM      | 0-10 $\mu$ M  | 30 min        | -           |                                                                                   |
| <br>[4] | Cys              | 460/560                          | 0.06 $\mu$ M  | 0-100 $\mu$ M | 15 min        | -           | Imaging in HeLa cells                                                             |
|                                                                                            | Hcy              | 460/560                          | 0.084 $\mu$ M | 0-50 $\mu$ M  | 15 min        | -           |                                                                                   |

|                                                                                            |         |                    |                    |                      |        |         |                                                                                |
|--------------------------------------------------------------------------------------------|---------|--------------------|--------------------|----------------------|--------|---------|--------------------------------------------------------------------------------|
| 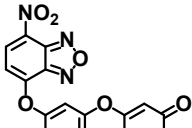<br>[5]   | Cys     | 470/540            |                    | 3.1-90 $\mu\text{M}$ | 5 min  | 86-fold | Simultaneous determination<br>of Cys and GSH in human<br>plasma                |
|                                                                                            |         | 470/585            | 0.13 $\mu\text{M}$ | 1-40 $\mu\text{M}$   |        | 41-fold |                                                                                |
| <br>[6]   | GSH     | 470/585            | 0.07 $\mu\text{M}$ | 1-18 $\mu\text{M}$   | 5 min  | 43-fold | Imaging intracellular<br>biothiols in living cells and<br><i>Daphnia magna</i> |
|                                                                                            | Cys     | 470/547            | 15 nM              | 0-40 $\mu\text{M}$   | 10 min |         |                                                                                |
|                                                                                            |         | 570/610            |                    | 0-25 $\mu\text{M}$   |        |         |                                                                                |
|                                                                                            | Hcy     | 470/547            | 34 nM              | 0-60 $\mu\text{M}$   | 10 min | -       |                                                                                |
|                                                                                            |         | 570/610            |                    | 0-60 $\mu\text{M}$   |        |         |                                                                                |
|                                                                                            | GSH     | 570/610            | 30 nM              | 0-20 $\mu\text{M}$   | 10 min |         |                                                                                |
| <br>[7]   | Cys     | 470/547            | 2.1 $\mu\text{M}$  | 0-500 $\mu\text{M}$  | 60 min |         | Imaging in HeLa cells                                                          |
|                                                                                            |         | 570/610            |                    |                      |        |         |                                                                                |
|                                                                                            | Hcy     | 470/547            | 2.7 $\mu\text{M}$  | 0-500 $\mu\text{M}$  | 60 min | -       |                                                                                |
|                                                                                            |         | 570/610            |                    |                      |        |         |                                                                                |
| <br>[8]  | GSH     | 570/621            | 6.4 $\mu\text{M}$  | 0-600 $\mu\text{M}$  | 60 min |         | Distinguishing Cys/Hcy from<br>GSH in real biological<br>systems               |
|                                                                                            | Cys     | 490/565            | 95.6 nM            | 20-160 $\mu\text{M}$ | 7 min  |         |                                                                                |
|                                                                                            |         | 490/630            |                    |                      |        |         |                                                                                |
| <br>[9] | Hcy     | 490/565            | 24.7 nM            | 0-140 $\mu\text{M}$  | 7 min  | -       | Imaging in MCF-7 cells                                                         |
|                                                                                            |         | 490/630            |                    |                      |        |         |                                                                                |
|                                                                                            | GSH     | 490/630            | 39.3 nM            | 20-160 $\mu\text{M}$ | 7 min  |         |                                                                                |
|                                                                                            | Cys     | 470/543            | 0.13 $\mu\text{M}$ | 0-70 $\mu\text{M}$   | 180 s  |         |                                                                                |
|                                                                                            | 470/636 |                    |                    |                      |        |         |                                                                                |
|                                                                                            | 565/636 | 0.05 $\mu\text{M}$ | 0-75 $\mu\text{M}$ | 30 s                 |        |         |                                                                                |

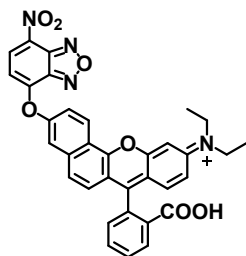

[10]

|                  |         |               |                |        |  |
|------------------|---------|---------------|----------------|--------|--|
| Cys              | 435/543 | 52 nM         | 0-15 $\mu$ M   | 20 min |  |
|                  | 435/643 |               |                |        |  |
| Hcy              | 435/543 | 77 nM         | 0-15 $\mu$ M   | 20 min |  |
|                  | 435/643 |               |                |        |  |
| GSH              | 435/643 | 65 nM         | 0-15 $\mu$ M   | 20 min |  |
| H <sub>2</sub> S | 435/643 | 62 nM         | 0-15 $\mu$ M   | 20 min |  |
| Cys              | 481/556 | 0.248 $\mu$ M | 20-120 $\mu$ M | 3 min  |  |
|                  | 570/668 |               |                |        |  |

Imaging in living cells and zebrafish

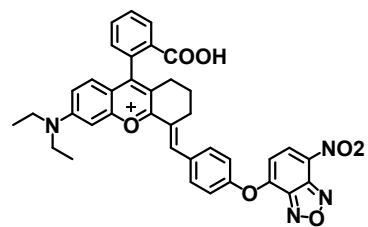

[11]

|                  |         |               |               |        |  |
|------------------|---------|---------------|---------------|--------|--|
| Hcy              | 481/556 | 0.251 $\mu$ M | 0-200 $\mu$ M | 8 min  |  |
|                  | 570/668 |               |               |        |  |
| GSH              | 395/499 | 0.31 $\mu$ M  | 0-60 $\mu$ M  | 30 min |  |
|                  | 570/668 | 0.28 $\mu$ M  | 0-70 $\mu$ M  |        |  |
| H <sub>2</sub> S | 570/668 | 1.5 $\mu$ M   | 0-300 $\mu$ M | 25 min |  |
| SO <sub>2</sub>  | 395/499 | 0.365 $\mu$ M | 20-70 $\mu$ M | 27 min |  |
|                  | 570/668 |               |               |        |  |

Imaging in HeLa cells

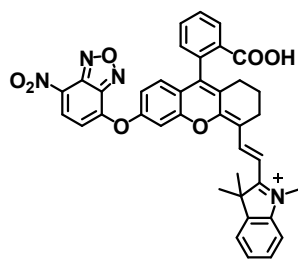

[12]

|                  |         |       |               |        |  |
|------------------|---------|-------|---------------|--------|--|
| Cys              | 463/544 | 21 nM | 2-150 $\mu$ M | 7 min  |  |
|                  | 650/707 |       |               |        |  |
| Hcy              | 463/544 | 37 nM | 2-200 $\mu$ M | 20 min |  |
|                  | 650/707 |       |               |        |  |
| GSH              | 650/707 | 28 nM | 2-100 $\mu$ M | 10 min |  |
| H <sub>2</sub> S | 650/707 | 15 nM | 2-70 $\mu$ M  | 10 min |  |

Distinguishing Cys/Hcy in cellular context by dual-color fluorescence imaging

|                                                                                             |                  |         |         |           |        |           |                                                                                                                                   |
|---------------------------------------------------------------------------------------------|------------------|---------|---------|-----------|--------|-----------|-----------------------------------------------------------------------------------------------------------------------------------|
| 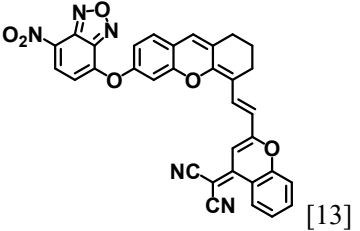           | H <sub>2</sub> S | 613/744 | 26 nM   | 0-25 μM   | 3 min  | 40-fold   | Imaging exogenous and endogenous H <sub>2</sub> S in living cells and rapid imaging of H <sub>2</sub> S in living mice            |
|                                                                                             | Cys              | 480/550 | 1.1 μM  | 5-200 μM  |        | 58.3-fold | Endogenous and exogenous biothiols and H <sub>2</sub> S imaging, and measurement in urine samples of bladder cancer (BC) patients |
|                                                                                             | Hcy              | 480/661 | 1.5 μM  | 5-200 μM  |        | 56.3-fold |                                                                                                                                   |
|                                                                                             | Hcy              | 480/550 | 0.98 μM | 5-200 μM  | 45 min | 85.8-fold |                                                                                                                                   |
|                                                                                             | Hcy              | 480/661 | 1.9 μM  | 5-200 μM  |        | 58.7-fold |                                                                                                                                   |
|                                                                                             | GSH              | 480/661 | 4.2 μM  | 10-500 μM |        | 67.1-fold |                                                                                                                                   |
|  This Work | H <sub>2</sub> S | 480/661 | 0.35 μM | 1-50 μM   |        | 64.1-fold |                                                                                                                                   |

## References for Table S2

- [1] L. Zhai, Z. Shi, Y. Tu, S. Pu, A dual emission fluorescent probe enables simultaneous detection and discrimination of Cys/Hcy and GSH and its application in cell imaging, *Dyes Pigments* 165 (2019) 164–171. <https://doi.org/10.1016/j.dyepig.2019.02.010>
- [2] Q. Chen, J. Yang, Y. Li, J. Zheng, R. Yang, Sensitive and rapid detection of endogenous hydrogen sulfide distributing in different mouse viscera via a two-photon fluorescent probe, *Anal. Chim. Acta* 896 (2015) 128–136. <http://dx.doi.org/10.1016/j.aca.2015.05.040>
- [3] Y. Zhang, C. Liu, W. Sun, Z. Yu, M. Su, X. Rong, X. Wang, K. Wang, X. Li, H. Zhu, M. Yu, W. Sheng, B. Zhu, Concise Biothiol-Activatable HPQ-NBD Conjugate as a Targeted Theranostic Probe for Tumor Cells, *Anal. Chem.* 94 (2022) 7140–7147. <https://doi.org/10.1021/acs.analchem.2c01459>
- [4] W. Wang, M. Ji, J. Chen, P. Wang, A novel turn-on type AIE fluorescent probe for highly selective detection of cysteine/homocysteine and its application in living cells, *Talanta* 239 (2022) 123091. <https://doi.org/10.1016/j.talanta.2021.123091>
- [5] X. Gao, X. Li, L. Li, J. Zhou, H. Ma, A simple fluorescent off-on probe for the discrimination of cysteine from glutathione, *Chem. Commun.* 51 (2015) 9388–9390. <https://doi.org/10.1039/C5CC02788H>
- [6] M. Yang, J. Fan, W. Sun, J. Du, S. Long, X. Peng, Simultaneous visualization of cysteine/homocysteine and glutathione in living cells and *Daphnia magna* via dual-signaling fluorescent chemosensor, *Dyes Pigments* 168 (2019) 189–196. <https://doi.org/10.1016/j.dyepig.2019.04.056>
- [7] W. Chen, H. Luo, X. Liu, J.W. Foley, X. Song, Broadly Applicable Strategy for the Fluorescence Based Detection and Differentiation of Glutathione and Cysteine/Homocysteine: Demonstration in Vitro and in Vivo, *Anal. Chem.* 88 (2016) 3638–3646. <https://doi.org/10.1021/acs.analchem.5b04333>

- [8] X. Ren, Y. Zhang, F. Zhang, H. Zhong, J. Wang, X. Liu, Z. Yang, X. Song, Red-emitting fluorescent probe for discrimination of Cys/Hcy and GSH with a large Stokes shift under a single-wavelength excitation, *Anal. Chim. Acta* 1097 (2020) 245–253. <https://doi.org/10.1016/j.aca.2019.11.030>
- [9] H. Niu, B. Ni, K. Chen, X. Yang, W. Cao, Y. Ye, Y. Zhao, A long-wavelength-emitting fluorescent probe for simultaneous discrimination of H<sub>2</sub>S/Cys/GSH and its bio-imaging applications, *Talanta* 196 (2019) 145–152. <https://doi.org/10.1016/j.talanta.2018.12.031>
- [10] H. Zhu, C. Liu, R. Yuan, R. Wang, H. Zhang, Z. Li, P. Jia, B. Zhu, W. Sheng, A simple highly specific fluorescent probe for simultaneous discrimination of cysteine/homocysteine and glutathione/hydrogen sulfide in living cells and zebrafish using two separated fluorescence channels under single wavelength excitation, *Analyst* 144 (2019) 4258–4265. <https://doi.org/10.1039/C9AN00818G>
- [11] Y. Zhang, L. Wen, W. Zhang, Y. Yue, J. Chao, F. Huo, C. Yin, Sulphide activity-dependent multicolor emission dye and its applications in in vivo imaging, *Analyst* 146 (2021) 5517–5527. <https://doi.org/10.1039/D1AN01345A>
- [12] X. Yang, L. He, K. Xu, W. Lin, A fluorescent dyad with large emission shift for discrimination of cysteine/homocysteine from glutathione and hydrogen sulfide and the application of bioimaging, *Anal. Chim. Acta* 981 (2017) 86–93. <http://dx.doi.org/10.1016/j.aca.2017.05.016>
- [13] S. Gong, E. Zhou, J. Hong, G. Feng, Nitrobenzoxadiazole Ether-Based Near-Infrared Fluorescent Probe with Unexpected High Selectivity for H<sub>2</sub>S Imaging in Living Cells and Mice, *Anal. Chem.* 91 (2019) 13136–13142.

### 3. Supplementary NMR and MS spectra

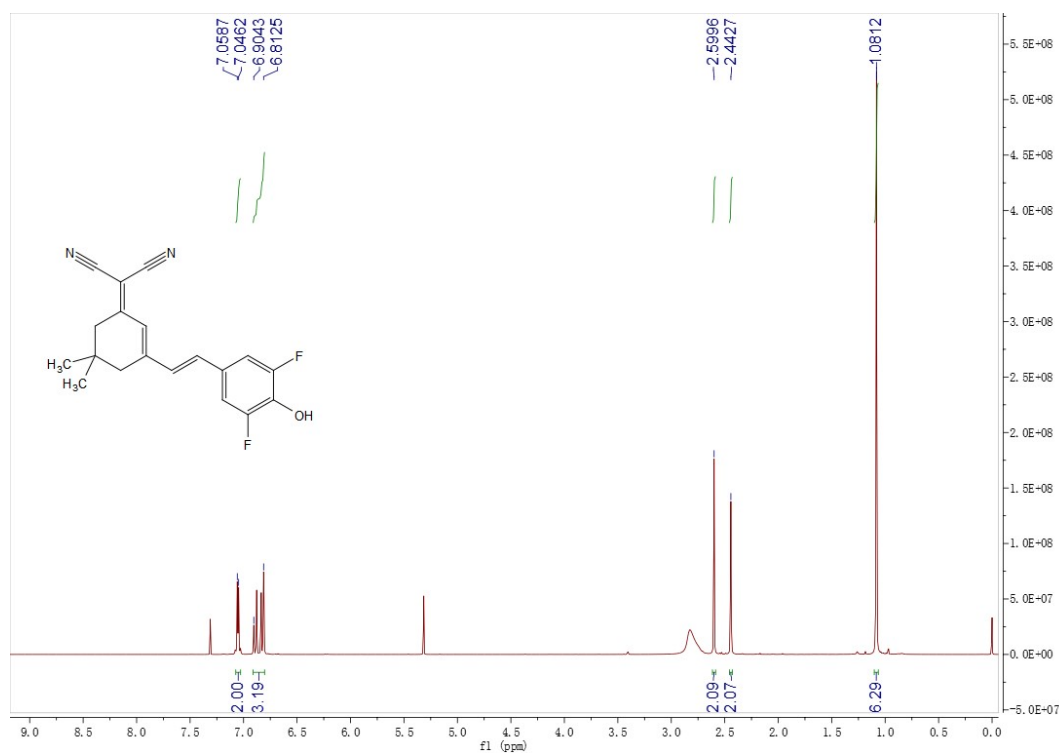

Figure S22. <sup>1</sup>H NMR Spectrum of 2FDCl.

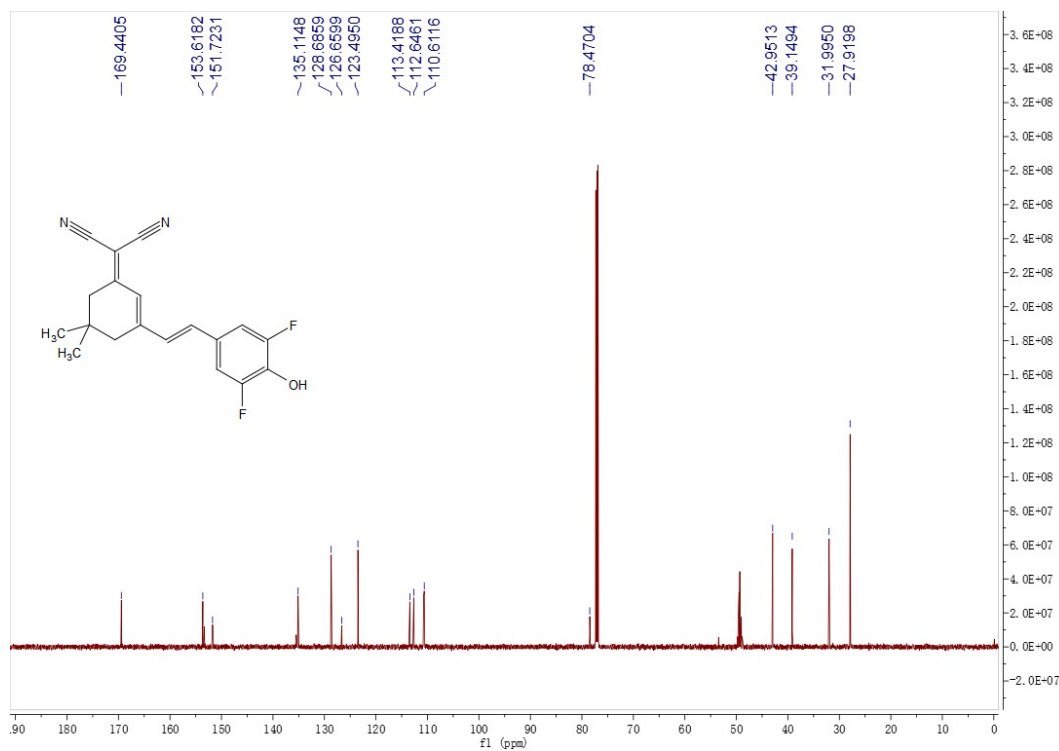

Figure S23. <sup>13</sup>C NMR Spectrum of 2FDCl.

## Mass Spectrum SmartFormula Report

**Analysis Info** Acquisition D 2024/6/25 17:47:46  
 Analysis Name C:\Users\23113\Desktop\6.260E\0625\_RB5\_01\_34071.d  
 Method N\_50-1500.m Operator Demo User  
 Sample Name 0625 Instrument compact 8255754.2017  
6

Comment

### Acquisition Paramet

|             |            |               |          |                  |           |
|-------------|------------|---------------|----------|------------------|-----------|
| Source Type | ESI        | Ion Polarity  | Negative | Set Nebulizer    | 3.0 Bar   |
| Focus       | Not active | Set Capillary | 2800 V   | Set Dry Heater   | 200 °C    |
| Scan Begin  | 50 m/z     | Set End Plate | -500 V   | Set Dry Gas      | 8.0 l/min |
| Scan End    | 1500 m/z   | Set Charging  | 2000 V   | Set Divert Valve | Waste     |
|             |            | Set Corona    | 0 nA     | Set APCI Heater  | 0 °C      |

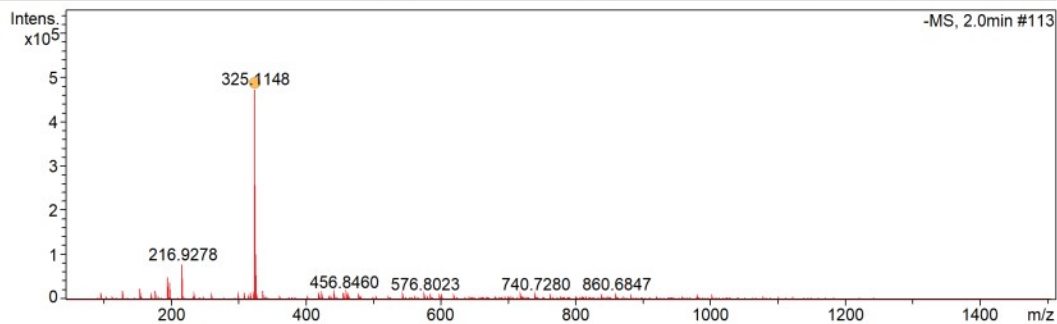

| Meas. m/z | # | Ion Formula | m/z      | err [ppm] | mSigma | # | mSigma | Score | rdb  | e <sub>i</sub> | Conf | N-Rule |
|-----------|---|-------------|----------|-----------|--------|---|--------|-------|------|----------------|------|--------|
| 325.1148  | 1 | C19H15F2N2O | 325.1158 | 3.0       | 1.3    | 1 | 100.00 | 12.0  | even |                | ok   |        |

**Figure S24.** Mass Spectrum of 2FDCI.

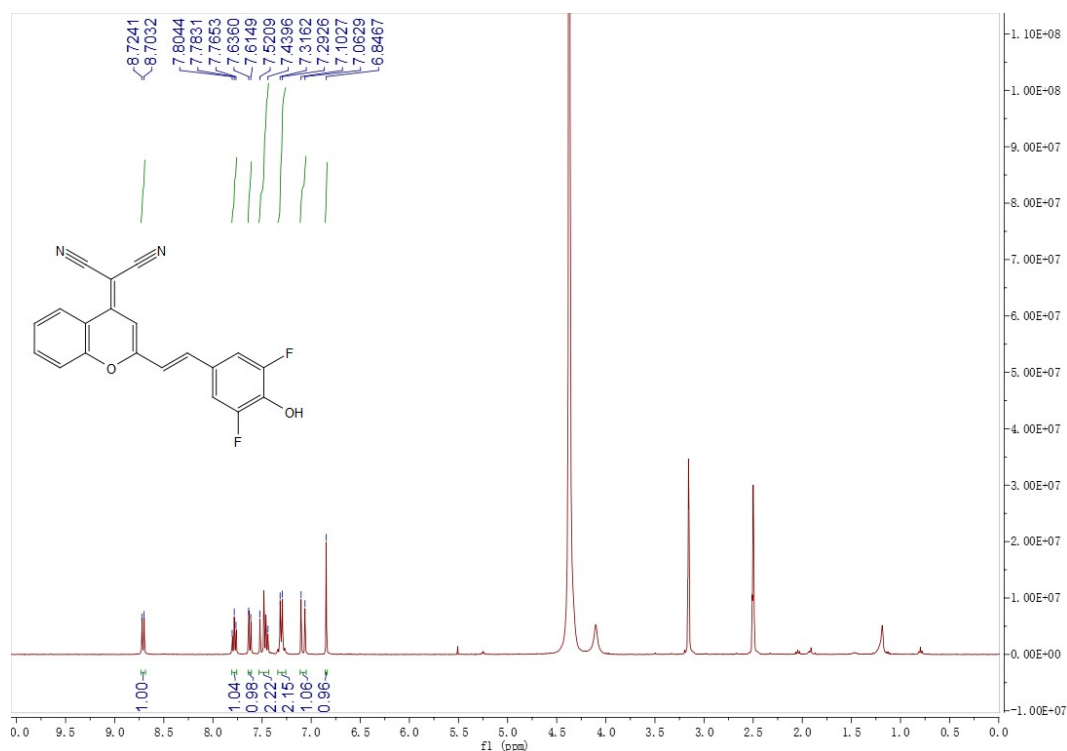

**Figure S25.** <sup>1</sup>H NMR Spectrum of 2FDCM.

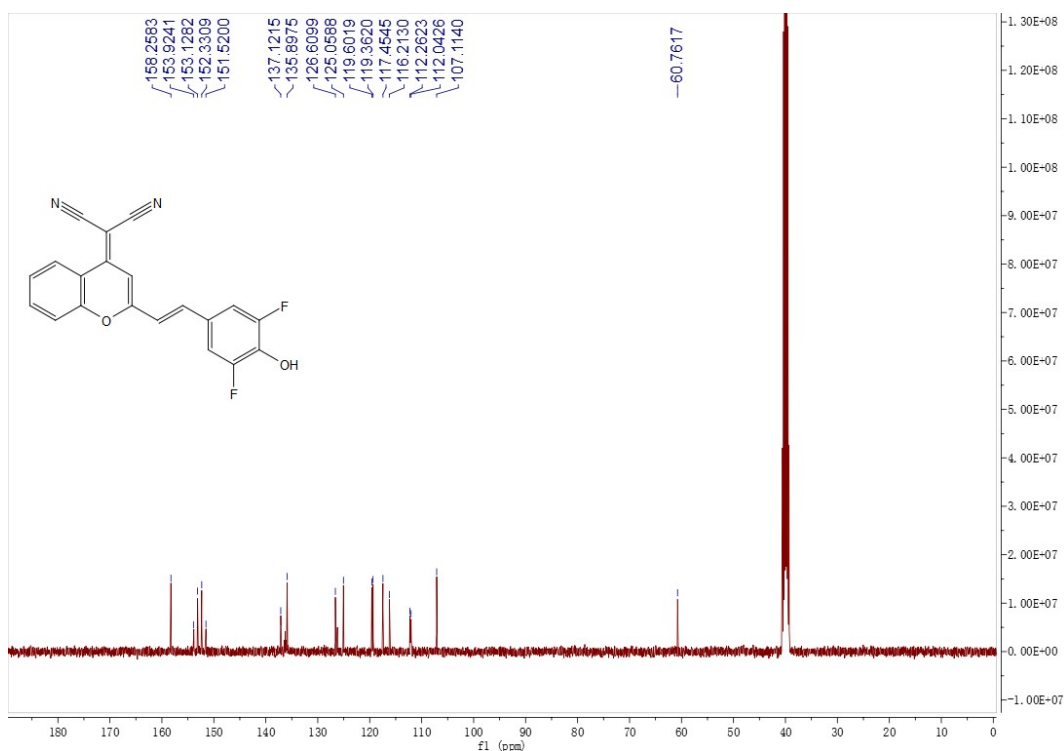

Figure S26. <sup>13</sup>C NMR Spectrum of 2FDCM.

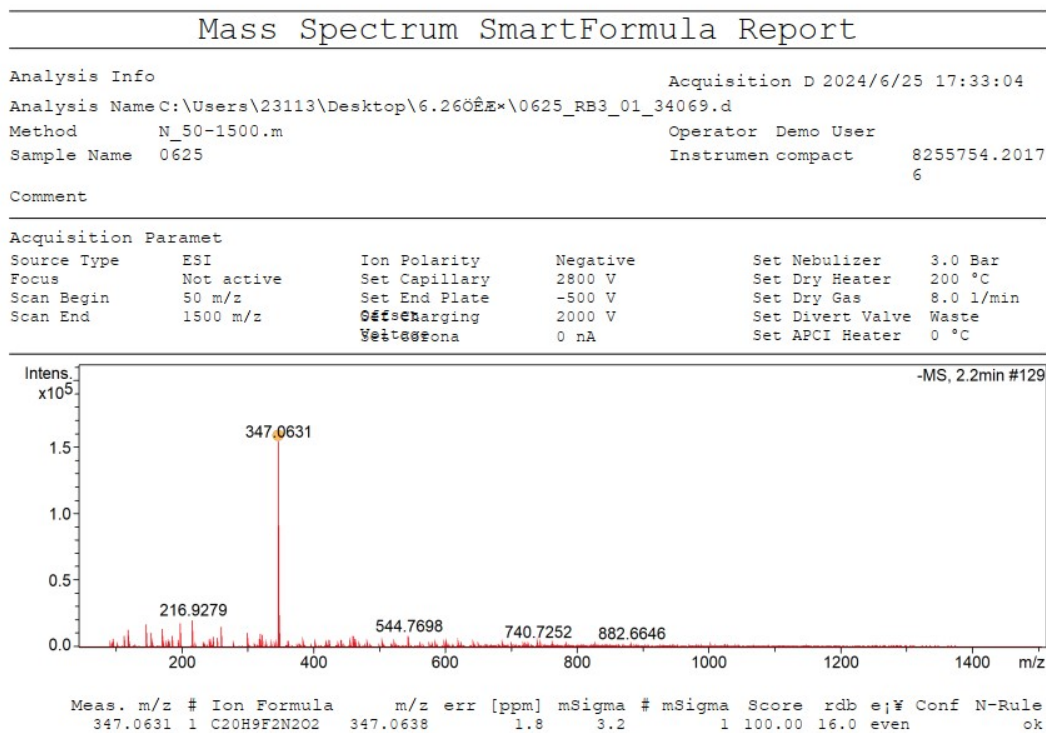

Figure S27. Mass Spectrum of 2FDCM.



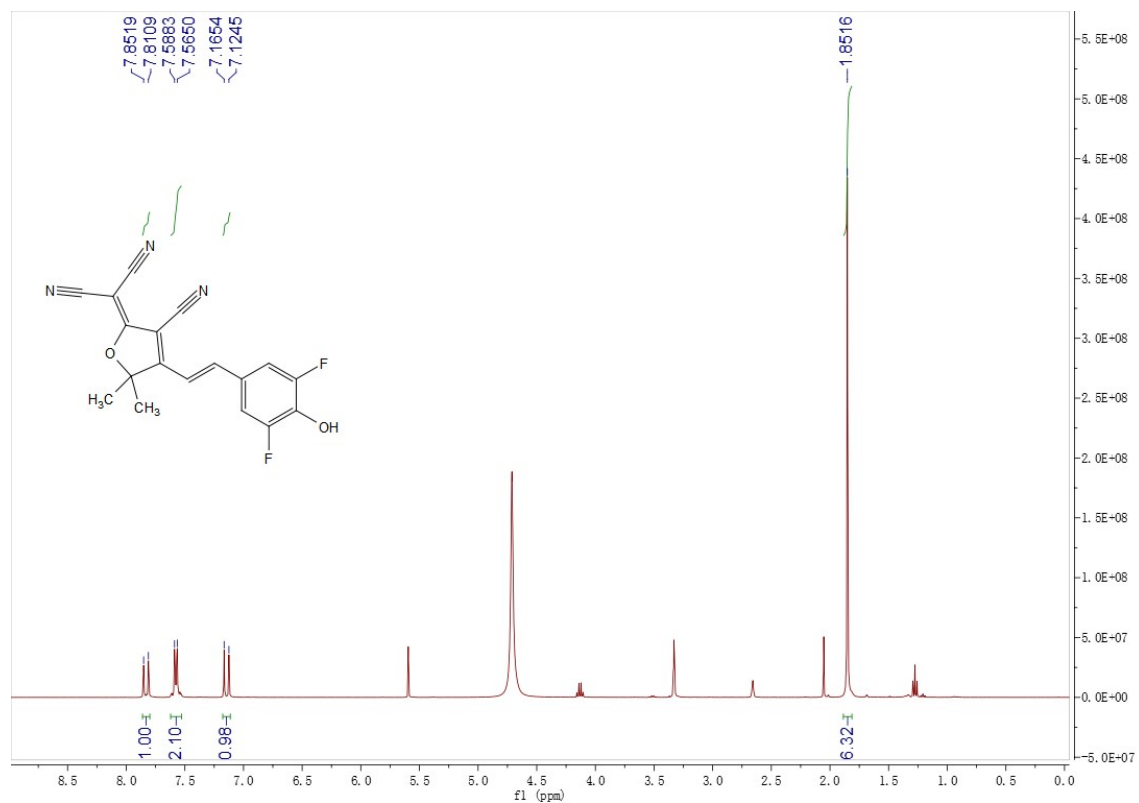

Figure S28.  $^1\text{H}$  NMR Spectrum of 2FTCF.

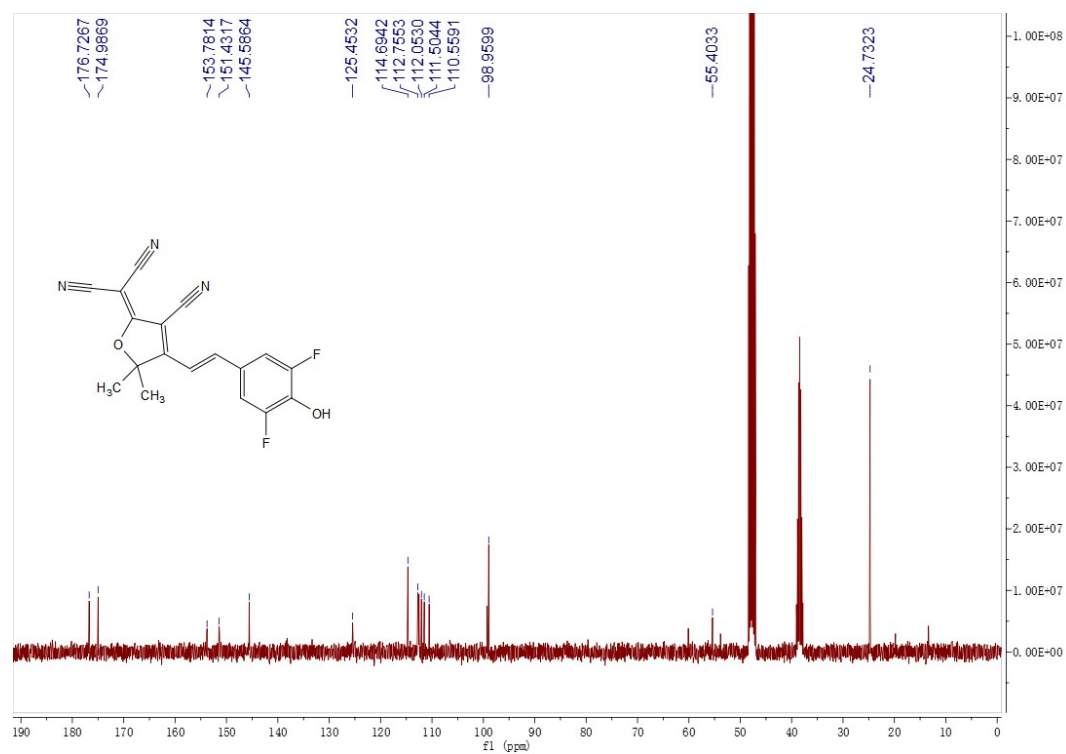

Figure S29.  $^{13}\text{C}$  NMR Spectrum of 2FTCF.

## Mass Spectrum SmartFormula Report

**Analysis Info** Acquisition D 2024/6/25 17:40:25  
 Analysis Name C:\Users\23113\Desktop\6.260E\*\0625\_RB4\_01\_34070.d  
 Method N\_50-1500.m Operator Demo User  
 Sample Name 0625 Instrument compact 8255754.2017  
6

Comment

**Acquisition Paramet**

|             |            |                 |          |                  |           |
|-------------|------------|-----------------|----------|------------------|-----------|
| Source Type | ESI        | Ion Polarity    | Negative | Set Nebulizer    | 3.0 Bar   |
| Focus       | Not active | Set Capillary   | 2800 V   | Set Dry Heater   | 200 °C    |
| Scan Begin  | 50 m/z     | Set End Plate   | -500 V   | Set Dry Gas      | 8.0 l/min |
| Scan End    | 1500 m/z   | Offset Charging | 2000 V   | Set Divert Valve | Waste     |
|             |            | Veit@@ona       | 0 nA     | Set APCI Heater  | 0 °C      |

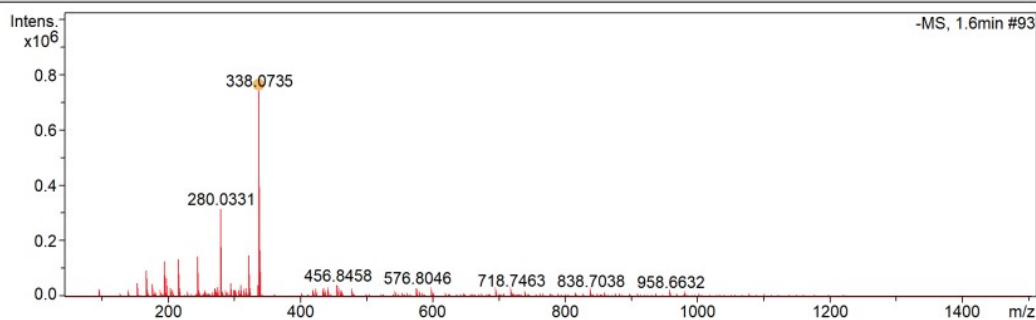

| Meas. m/z | # | Ion Formula  | m/z      | err [ppm] | mSigma | # | mSigma | Score | rdb  | e;# | Conf | N-Rule |
|-----------|---|--------------|----------|-----------|--------|---|--------|-------|------|-----|------|--------|
| 338.0735  | 1 | C18H10F2N3O2 | 338.0747 | 3.4       | 10.6   | 1 | 100.00 | 14.0  | even |     | ok   |        |

**Figure S30.** Mass Spectrum of 2FTCF.

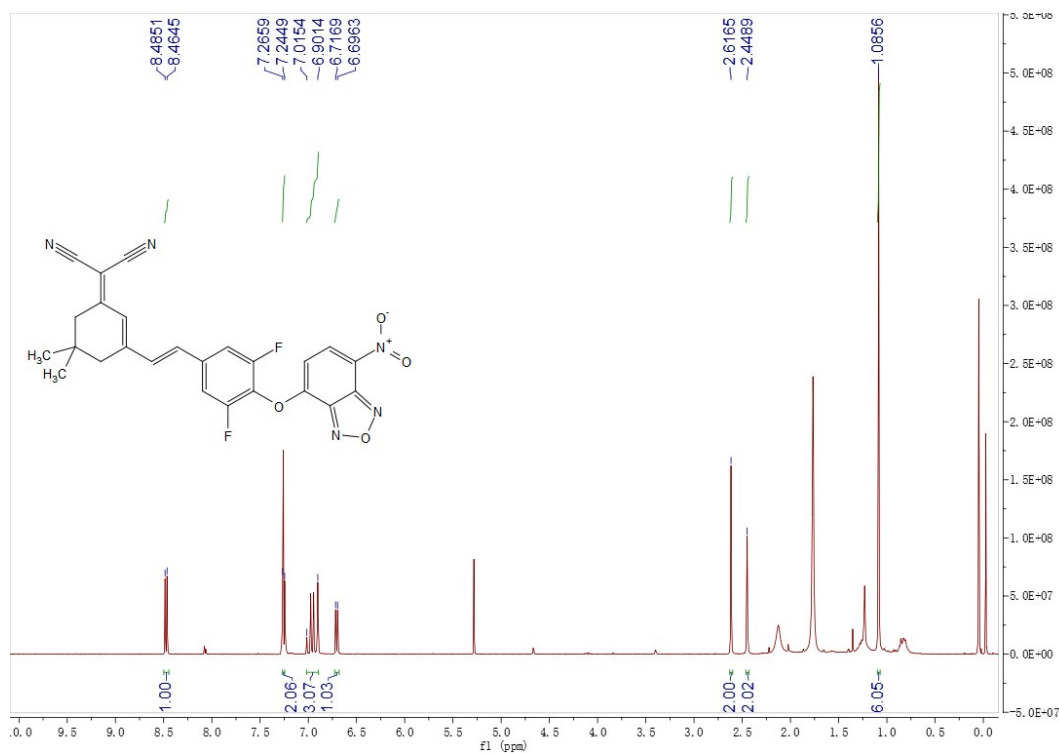

**Figure S31.** <sup>1</sup>H NMR Spectrum of NBD-2FDCI.

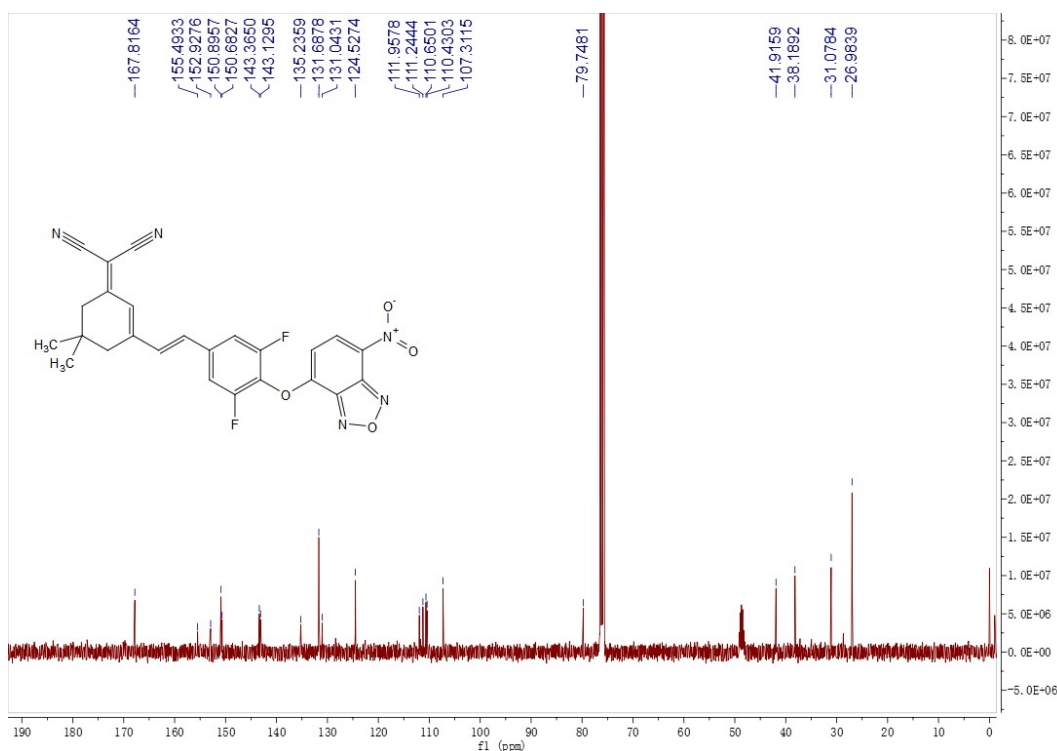

Figure S32. <sup>13</sup>C NMR Spectrum of NBD-2FDCl.

### Mass Spectrum SmartFormula Report

|                                                          |             |                                 |                      |
|----------------------------------------------------------|-------------|---------------------------------|----------------------|
| Analysis Info                                            |             | Acquisition D 2024/7/8 16:14:29 |                      |
| Analysis Name C:\Users\23113\Desktop\0705_RD4_01_34393.d |             |                                 |                      |
| Method                                                   | N_50-1500.m | Operator                        | Demo User            |
| Sample Name                                              | 0705        | Instrument                      | compact 8255754.2017 |
| Comment                                                  |             | 6                               |                      |

|                     |            |                  |           |
|---------------------|------------|------------------|-----------|
| Acquisition Paramet |            |                  |           |
| Source Type         | ESI        | Ion Polarity     | Negative  |
| Focus               | Not active | Set Capillary    | 2800 V    |
| Scan Begin          | 50 m/z     | Set End Plate    | -500 V    |
| Scan End            | 1500 m/z   | Set Charging     | 2000 V    |
|                     |            | Set Resona       | 0 nA      |
|                     |            | Set Nebulizer    | 3.0 Bar   |
|                     |            | Set Dry Heater   | 200 °C    |
|                     |            | Set Dry Gas      | 8.0 l/min |
|                     |            | Set Divert Valve | Waste     |
|                     |            | Set APCI Heater  | 0 °C      |

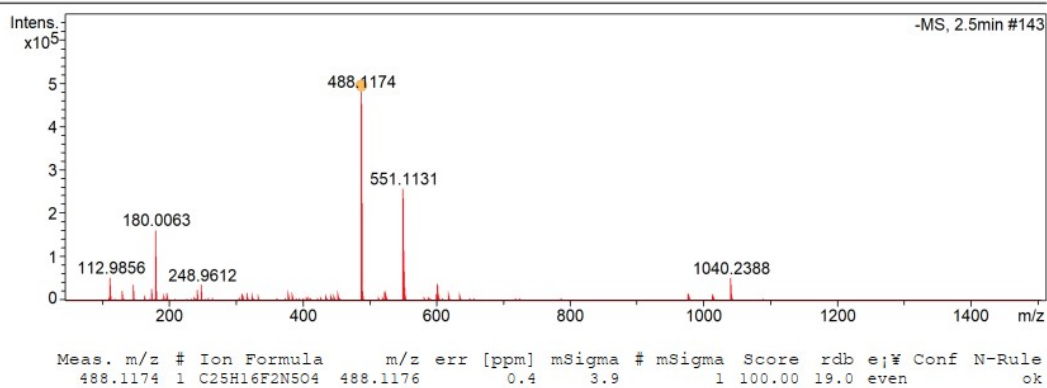

Figure S33. Mass Spectrum of NBD-2FDCl.

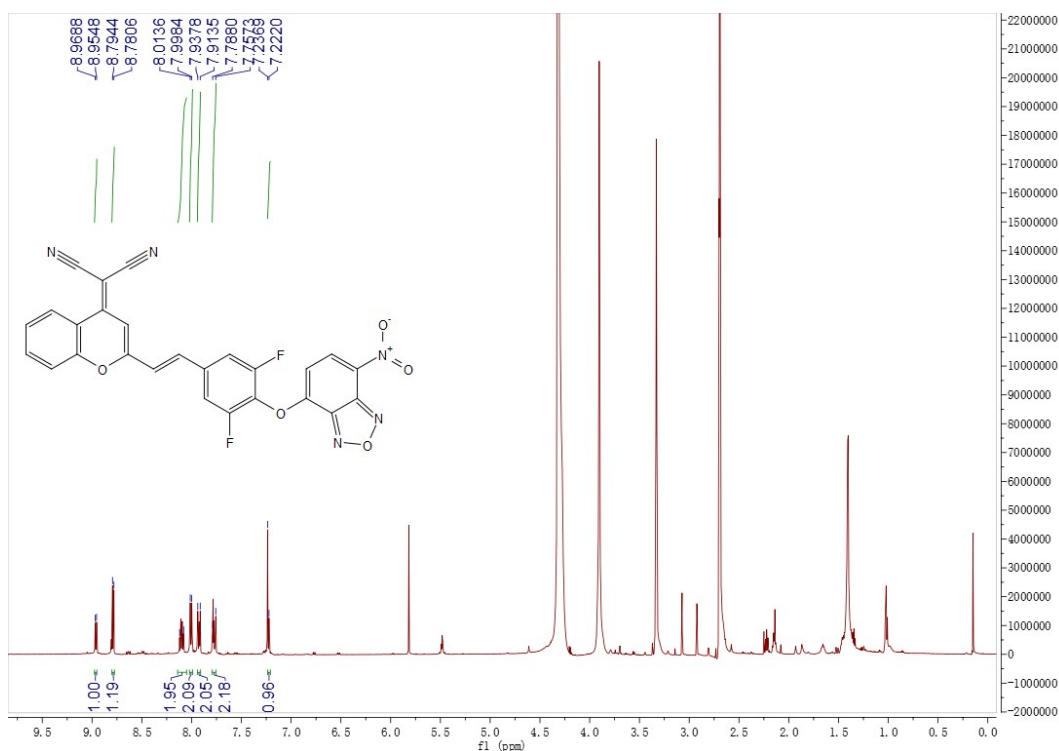

Figure S34. <sup>1</sup>H NMR Spectrum of NBD-2FDCM.

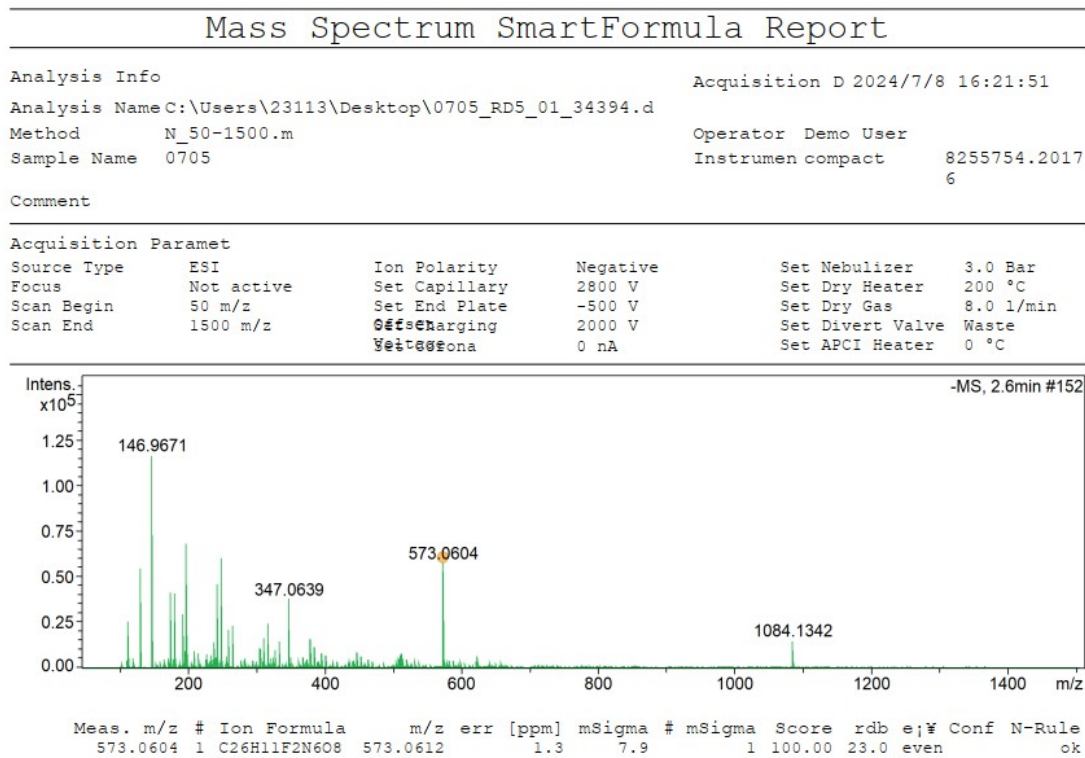

Figure S35. Mass Spectrum of NBD-2FDCM.

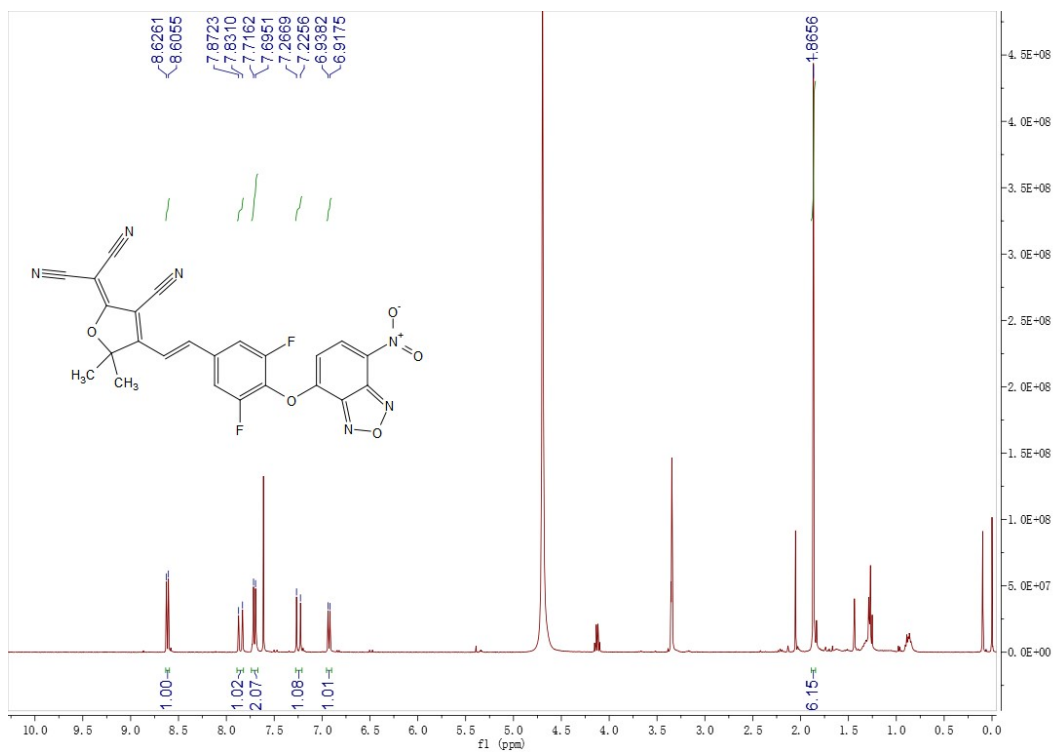

Figure S36.  $^1\text{H}$  NMR Spectrum of NBD-2FTCF.

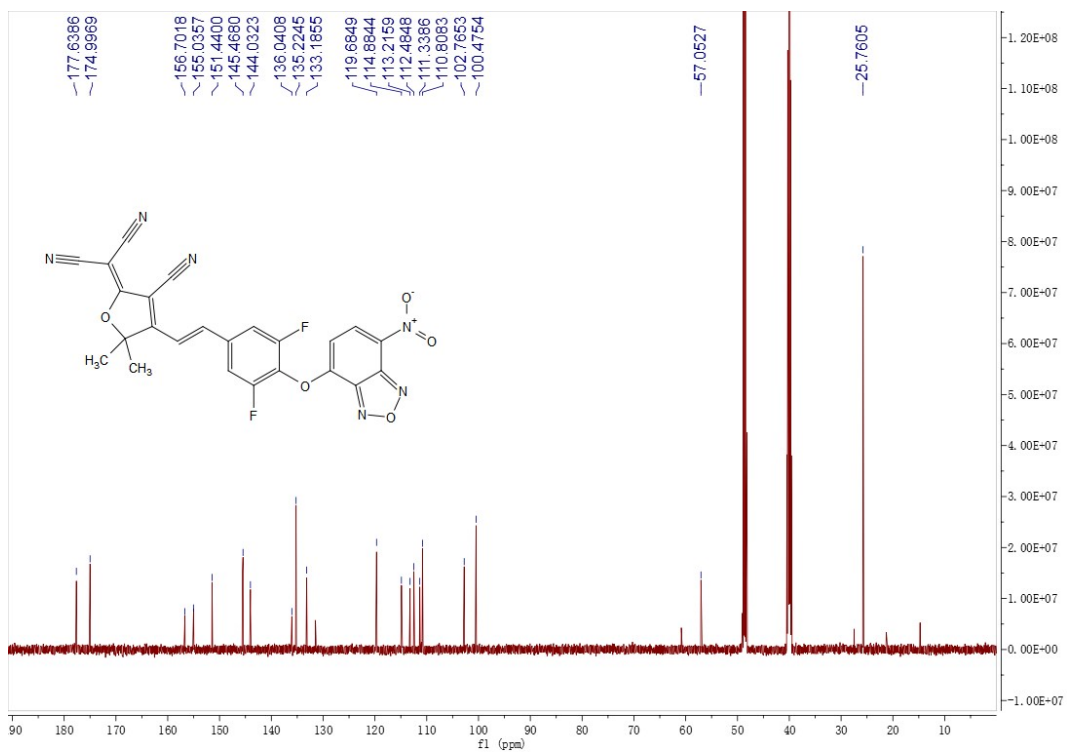

Figure S37.  $^{13}\text{C}$  NMR Spectrum of NBD-2FTCF.

## Mass Spectrum SmartFormula Report

|                                                                 |                                  |
|-----------------------------------------------------------------|----------------------------------|
| Analysis Info                                                   | Acquisition D 2024/6/25 18:02:27 |
| Analysis Name C:\Users\23113\Desktop\6.260E\0625_RB7_01_34073.d |                                  |
| Method N_50-1500.m                                              | Operator Demo User               |
| Sample Name 0625                                                | Instrument compact 8255754.20176 |

Comment

| Acquisition Paramet |            |               |          |                  |           |
|---------------------|------------|---------------|----------|------------------|-----------|
| Source Type         | ESI        | Ion Polarity  | Negative | Set Nebulizer    | 3.0 Bar   |
| Focus               | Not active | Set Capillary | 2800 V   | Set Dry Heater   | 200 °C    |
| Scan Begin          | 50 m/z     | Set End Plate | -500 V   | Set Dry Gas      | 8.0 l/min |
| Scan End            | 1500 m/z   | Set Charging  | 2000 V   | Set Divert Valve | Waste     |
|                     |            | Set Corona    | 0 nA     | Set APCI Heater  | 0 °C      |

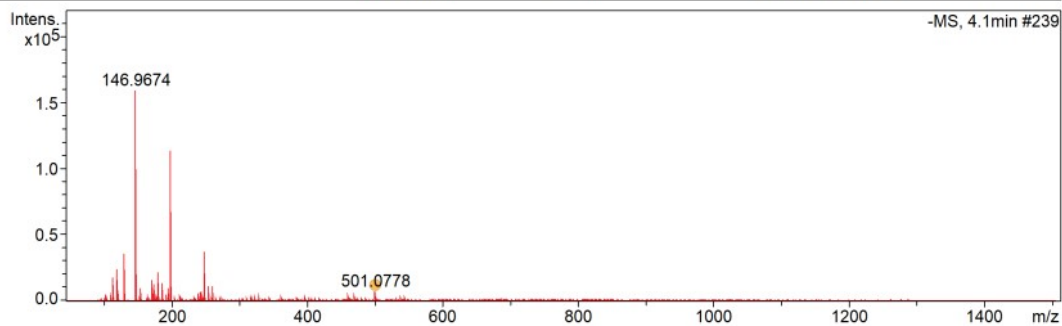

| Meas. m/z | # | Ion Formula  | m/z      | err [ppm] | mSigma | # | mSigma | Score | rdB  | e | ¶ | Conf | N-Rule |
|-----------|---|--------------|----------|-----------|--------|---|--------|-------|------|---|---|------|--------|
| 501.0778  | 1 | C24H11F2N6O5 | 501.0764 | -2.7      | 18.6   | 1 | 100.00 | 21.0  | even |   |   | ok   |        |

**Figure S38.** Mass Spectrum of NBD-2FTCF.

## Display Report

Analysis Info  
Analysis Name C:\Users\23113\Desktop\6.260EE\*\0625\_RB5\_01\_34071.d  
Method N\_50-1500.m  
Sample Name 0625  
Acquisition D 2024/6/25 17:47:46  
Operator Demo User  
Instrument compact 8255754.2017  
6

Comment

### Acquisition Paramet

|             |            |               |          |                  |           |
|-------------|------------|---------------|----------|------------------|-----------|
| Source Type | ESI        | Ion Polarity  | Negative | Set Nebulizer    | 3.0 Bar   |
| Focus       | Not active | Set Capillary | 2800 V   | Set Dry Heater   | 200 °C    |
| Scan Begin  | 50 m/z     | Set End Plate | -500 V   | Set Dry Gas      | 8.0 l/min |
| Scan End    | 1500 m/z   | Set Charging  | 2000 V   | Set Divert Valve | Waste     |
|             |            | Set Corona    | 0 nA     | Set APCI Heater  | 0 °C      |

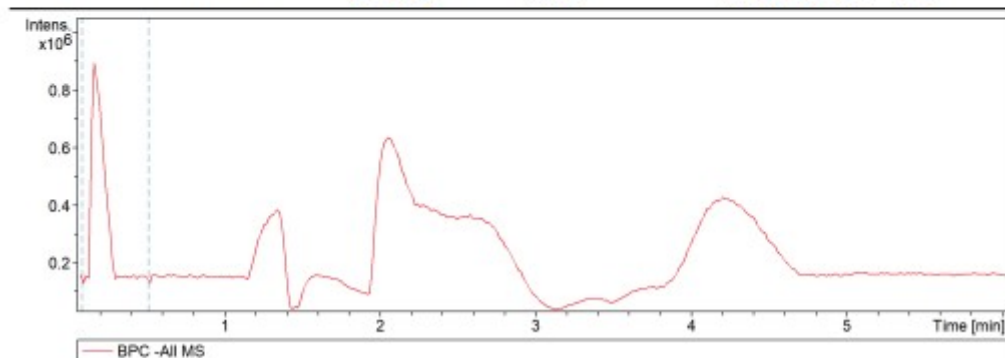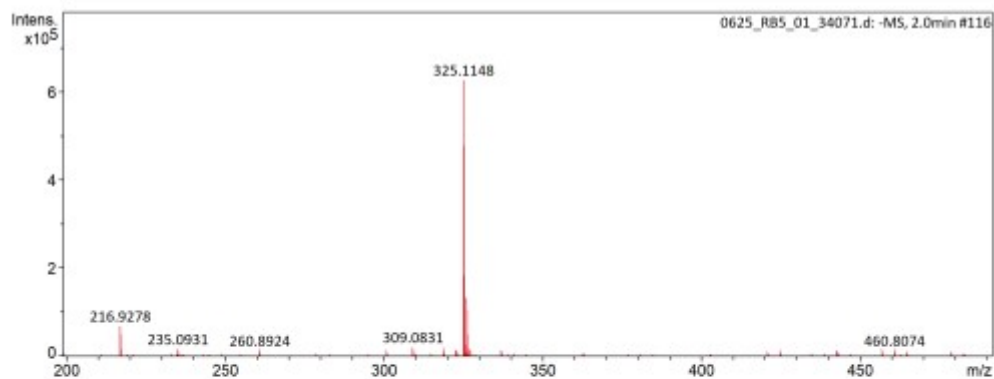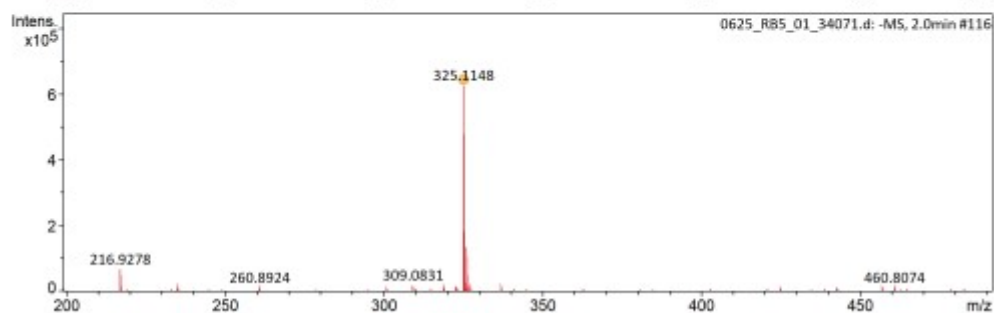

0625\_RB5\_01\_34071.d

Bruker Compass DataAnalysis 4.4 printe 2021/2/17 8:15:59 by: GYJ Page 1 of 1

**Figure S39.** Full HPLC-HRMS spectrum of **2FDCI** with eluted time at 2.0 min and found m/z 325.1148.

## Display Report

Analysis Info  
Analysis Name C:\Users\23113\Desktop\0705\_RD4\_01\_34393.d  
Method N\_50-1500.m  
Sample Name 0705  
Acquisition D 2024/7/8 16:14:29  
Operator Demo User  
Instrument compact 8255754.2017  
6

Comment

### Acquisition Paramet

|             |            |               |          |                  |           |
|-------------|------------|---------------|----------|------------------|-----------|
| Source Type | ESI        | Ion Polarity  | Negative | Set Nebulizer    | 3.0 Bar   |
| Focus       | Not active | Set Capillary | 2800 V   | Set Dry Heater   | 200 °C    |
| Scan Begin  | 50 m/z     | Set End Plate | -500 V   | Set Dry Gas      | 8.0 l/min |
| Scan End    | 1500 m/z   | Set Charging  | 2000 V   | Set Divert Valve | Waste     |
|             |            | Set Corona    | 0 nA     | Set APCI Heater  | 0 °C      |

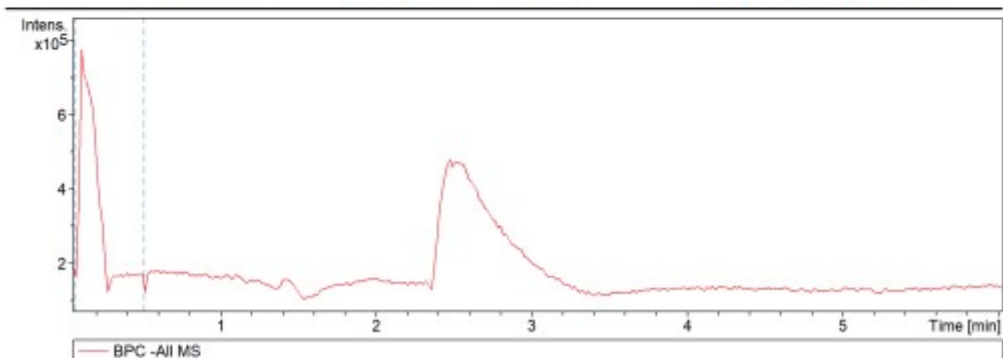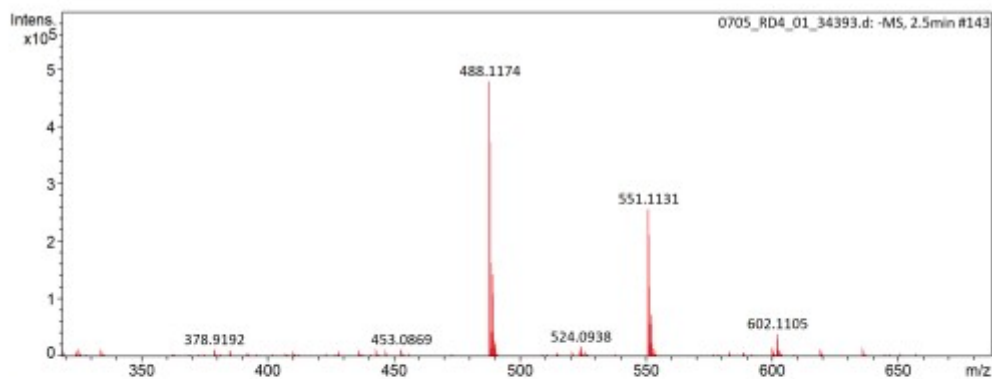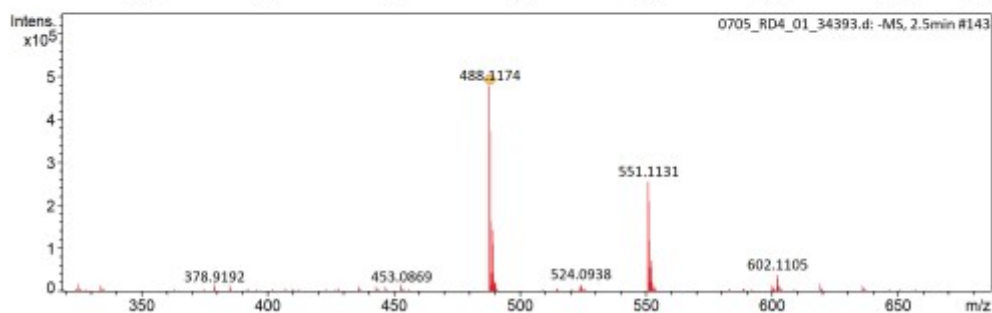

0705\_RD4\_01\_34393.d  
Bruker Compass DataAnalysis 4.4    printed 2021/2/17 8:17:10    by: GYJ    Page 1 of 1

**Figure S40.** Full HPLC-HRMS spectrum of NBD-2FDCI with eluted time at 2.5 min and found m/z 488.1174.



# Display Report

Analysis Info Acquisition D 2024/6/25 18:17:09  
Analysis Name C:\Users\23113\Desktop\6.260EX\0625\_RC1\_01\_34075.d  
Method N\_50-1500.m Operator Demo User  
Sample Name 0625 Instrument compact 8255754.2017  
6  
Comment

## Acquisition Paramet

|             |            |               |          |                  |           |
|-------------|------------|---------------|----------|------------------|-----------|
| Source Type | ESI        | Ion Polarity  | Negative | Set Nebulizer    | 3.0 Bar   |
| Focus       | Not active | Set Capillary | 2800 V   | Set Dry Heater   | 200 °C    |
| Scan Begin  | 50 m/z     | Set End Plate | -500 V   | Set Dry Gas      | 8.0 l/min |
| Scan End    | 1500 m/z   | Set Charging  | 2000 V   | Set Divert Valve | Waste     |
|             |            | Set Voltage   | 0 nA     | Set APCI Heater  | 0 °C      |

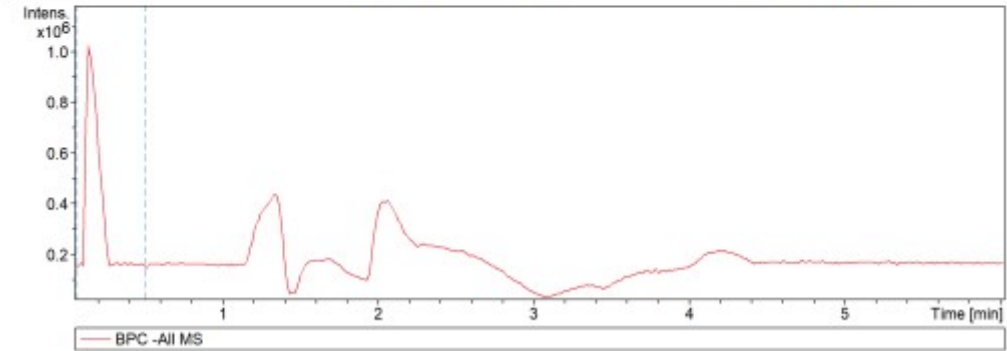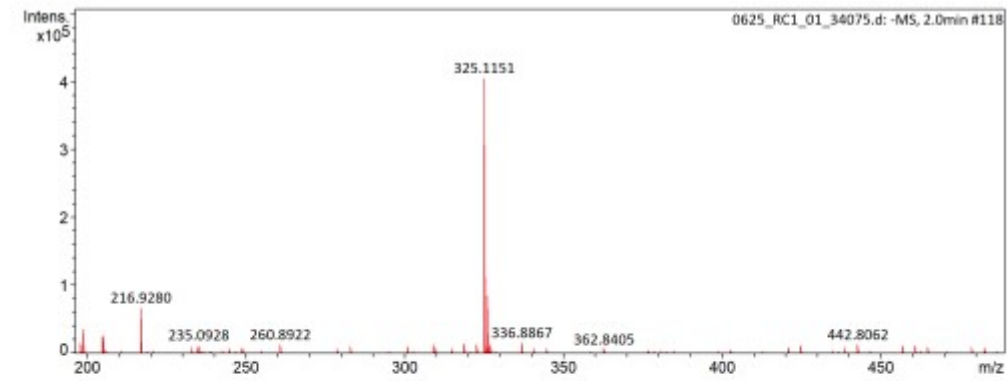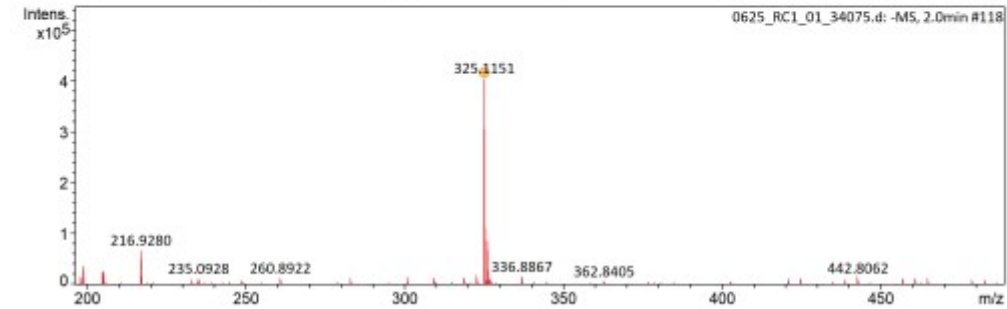

**Figure S41.** Full HPLC-HRMS spectrum of Cys acted NBD-2FDCI with eluted time at 2.0 min and found m/z 325.1151.

## Display Report

Analysis Info Acquisition D 2024/6/25 18:17:09  
Analysis Name C:\Users\23113\Desktop\6.2602Ex\0625\_RC1\_01\_34075.d  
Method N\_50-1500.m Operator Demo User  
Sample Name 0625 Instrumen compact 8255754.2017  
6

Comment

### Acquisition Paramet

|             |            |               |          |                  |           |
|-------------|------------|---------------|----------|------------------|-----------|
| Source Type | ESI        | Ion Polarity  | Negative | Set Nebulizer    | 3.0 Bar   |
| Focus       | Not active | Set Capillary | 2800 V   | Set Dry Heater   | 200 °C    |
| Scan Begin  | 50 m/z     | Set End Plate | -500 V   | Set Dry Gas      | 8.0 l/min |
| Scan End    | 1500 m/z   | Set Charging  | 2000 V   | Set Divert Valve | Waste     |
|             |            | Set Corona    | 0 nA     | Set APCI Heater  | 0 °C      |

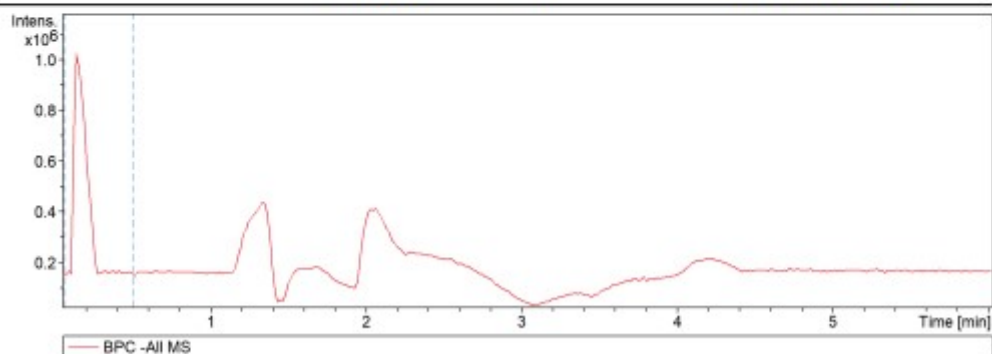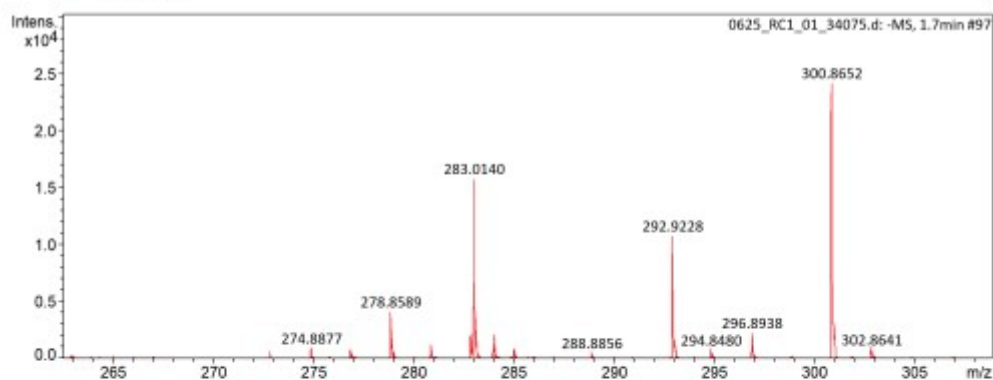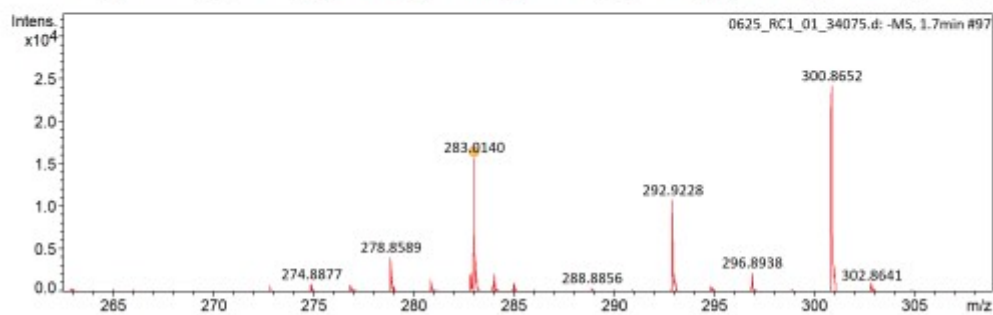

0625\_RC1\_01\_34075.d  
Bruker Compass DataAnalysis 4.4 printe 2021/2/17 8:07:05 by: GIJ Page 1 of 1

**Figure S42.** Full HPLC-HRMS spectrum of Cys acted NBD-2FDCI with eluted time at 1.7 min and found m/z 283.0140.

## Display Report

Analysis Info Acquisition D 2024/6/25 18:24:30  
Analysis Name C:\Users\23113\Desktop\6.260EE\0625\_RC2\_01\_34076.d  
Method N\_50-1500.m Operator Demo User  
Sample Name 0625 Instrument compact 8255754.2017  
6

Comment

### Acquisition Paramet

|             |            |               |          |                  |           |
|-------------|------------|---------------|----------|------------------|-----------|
| Source Type | ESI        | Ion Polarity  | Negative | Set Nebulizer    | 3.0 Bar   |
| Focus       | Not active | Set Capillary | 2800 V   | Set Dry Heater   | 200 °C    |
| Scan Begin  | 50 m/z     | Set End Plate | -500 V   | Set Dry Gas      | 8.0 l/min |
| Scan End    | 1500 m/z   | Set Charging  | 2000 V   | Set Divert Valve | Waste     |
|             |            | Set Corona    | 0 nA     | Set APCI Heater  | 0 °C      |

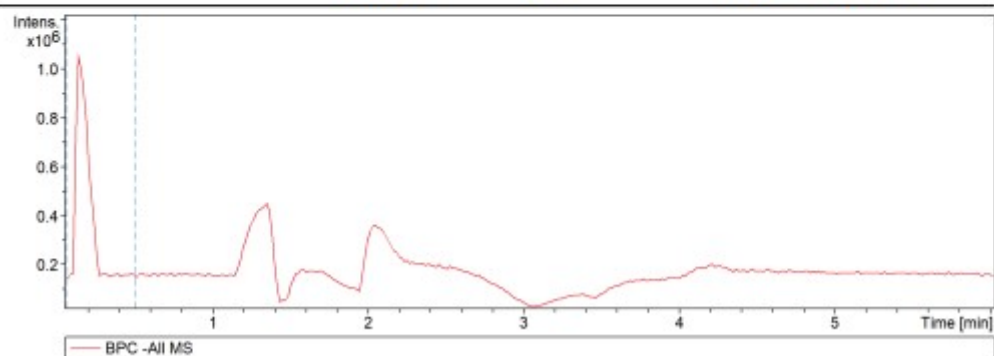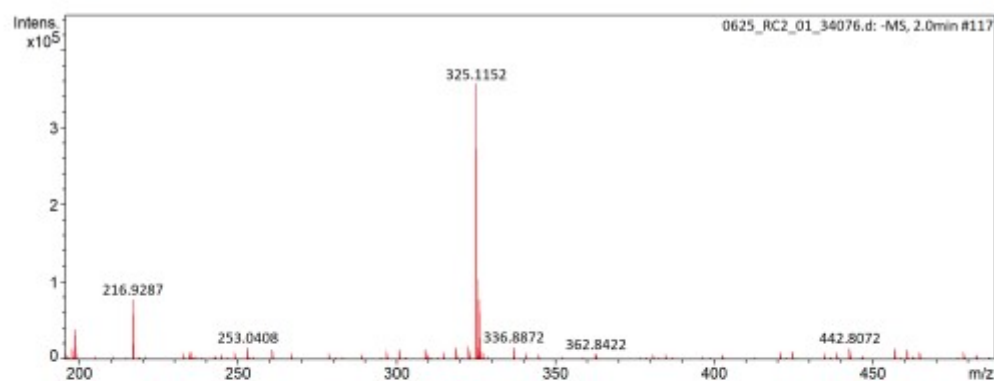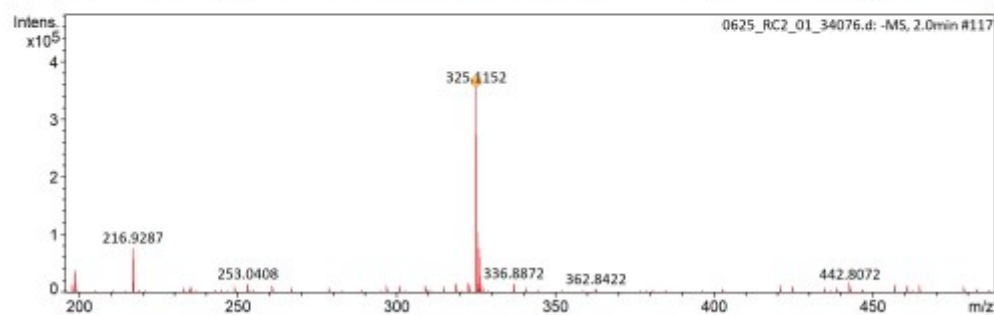

0625\_RC2\_01\_34076.d

Brucker Compass DataAnalysis 4.4 printe 2021/2/17 8:08:44 by: GYJ Page 1 of 1

**Figure S43.** Full HPLC-HRMS spectrum of Hcy acted NBD-2FDCI with eluted time at 2.0 min and found m/z 325.1152.

## Display Report

Analysis Info Acquisition D 2024/6/25 18:24:30  
Analysis Name C:\Users\23113\Desktop\6.260EX\0625\_RC2\_01\_34076.d  
Method N\_50-1500.m Operator Demo User  
Sample Name 0625 Instrument compact 8255754.2017  
Comment 6

Acquisition Paramet  
Source Type ESI Ion Polarity Negative Set Nebulizer 3.0 Bar  
Focus Not active Set Capillary 2800 V Set Dry Heater 200 °C  
Scan Begin 50 m/z Set End Plate -500 V Set Dry Gas 8.0 l/min  
Scan End 1500 m/z Set Charging 2000 V Set Divert Valve Waste  
Set APCI Heater 0 °C

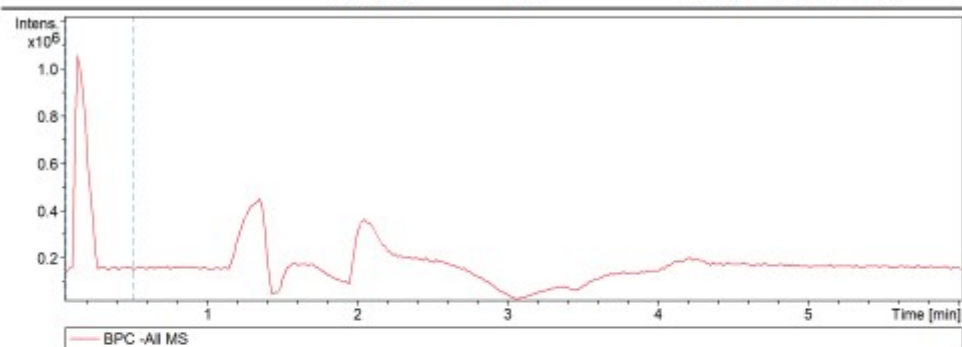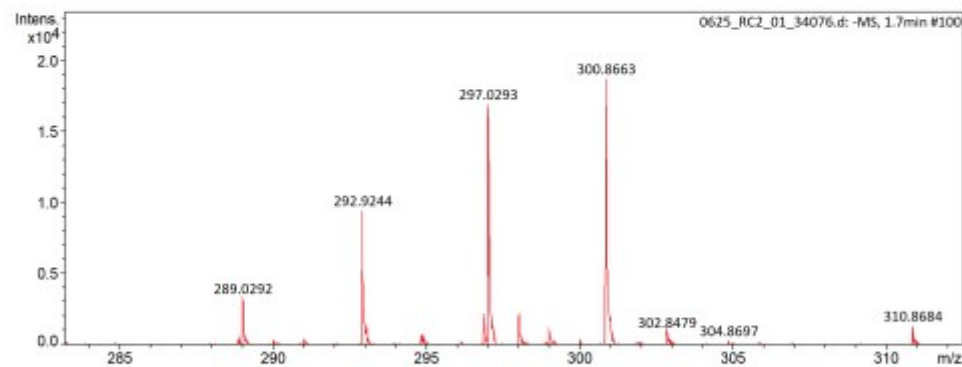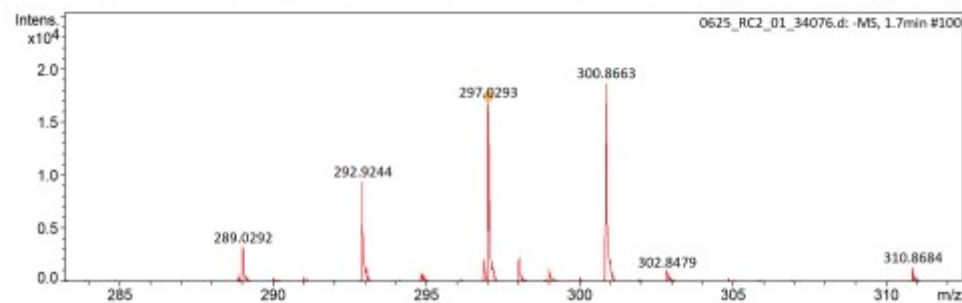

0625\_RC2\_01\_34076.d  
Bruker Compass DataAnalysis 4.4 printe 2021/2/17 3:09:32 by: GYJ Page 1 of 1

**Figure S44.** Full HPLC-HRMS spectrum of Cys acted NBD-2FDCI with eluted time at 1.7 min and found m/z 297.0293.

# Display Report

Analysis Info Acquisition D 2024/6/25 18:31:50  
Analysis Name C:\Users\29113\Desktop\6.260EEM\0625\_RC3\_01\_34077.d  
Method N\_50-1500.m Operator Demo User  
Sample Name 0625 Instrumen compact 8255754.2017  
6

## Comment

## Acquisition Paramet

|             |            |               |          |                  |           |
|-------------|------------|---------------|----------|------------------|-----------|
| Source Type | ESI        | Ion Polarity  | Negative | Set Nebulizer    | 3.0 Bar   |
| Focus       | Not active | Set Capillary | 2800 V   | Set Dry Heater   | 200 °C    |
| Scan Begin  | 50 m/z     | Set End Plate | -500 V   | Set Dry Gas      | 8.0 l/min |
| Scan End    | 1500 m/z   | Off-charging  | 2000 V   | Set Divert Valve | Waste     |
|             |            | Set Voltage   | 0 nA     | Set APCI Heater  | 0 °C      |

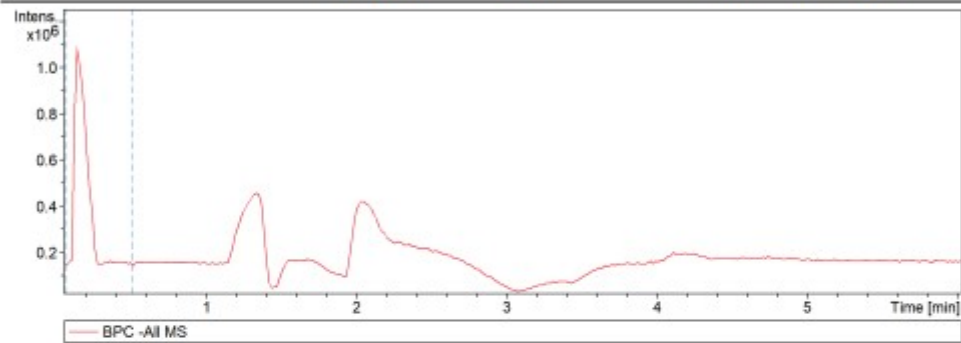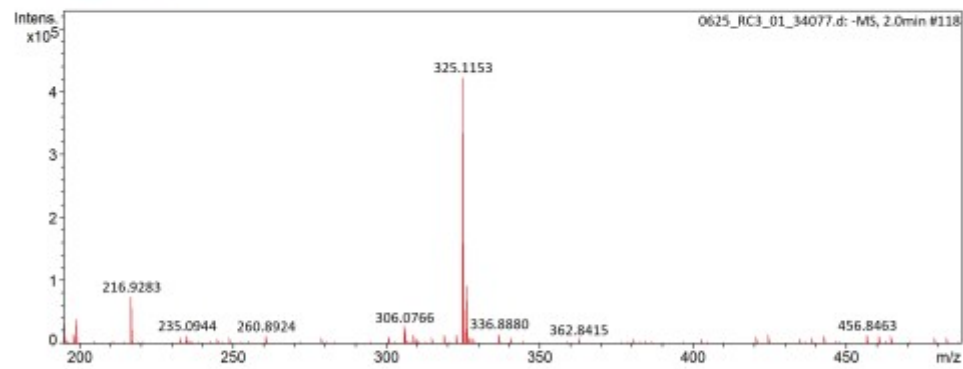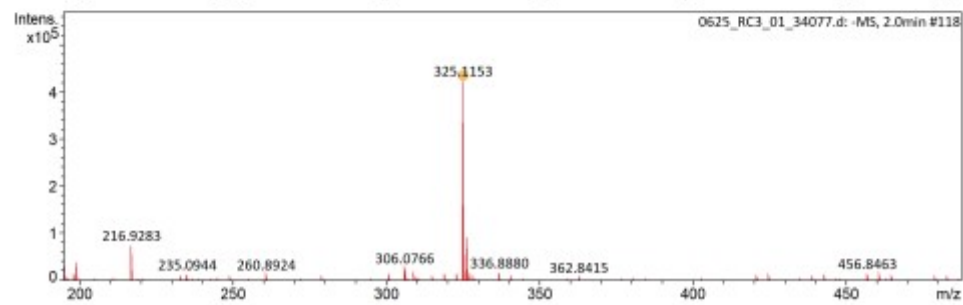

0625\_RC3\_01\_34077.d

Bruker Compass DataAnalysis 4.4 printe 2021/2/17 8:10:46

by: GYJ

Page 1 of 1

**Figure S45.** Full HPLC-HRMS spectrum of GSH acted NBD-2FDCI with eluted time at 2.0 min and found m/z 325.1153.

## Display Report

Analysis Info Acquisition D 2024/6/25 18:31:50  
Analysis Name C:\Users\23113\Desktop\6.260EE\0625\_RC3\_01\_34077.d  
Method N\_50-1500.m Operator Demo User  
Sample Name 0625 Instrument compact 8255754.2017  
6

Comment

### Acquisition Paramet

|             |            |               |          |                  |           |
|-------------|------------|---------------|----------|------------------|-----------|
| Source Type | ESI        | Ion Polarity  | Negative | Set Nebulizer    | 3.0 Bar   |
| Focus       | Not active | Set Capillary | 2800 V   | Set Dry Heater   | 200 °C    |
| Scan Begin  | 50 m/z     | Set End Plate | -500 V   | Set Dry Gas      | 8.0 l/min |
| Scan End    | 1500 m/z   | Set Charging  | 2000 V   | Set Divert Valve | Waste     |
|             |            | Set Corona    | 0 nA     | Set APCI Heater  | 0 °C      |

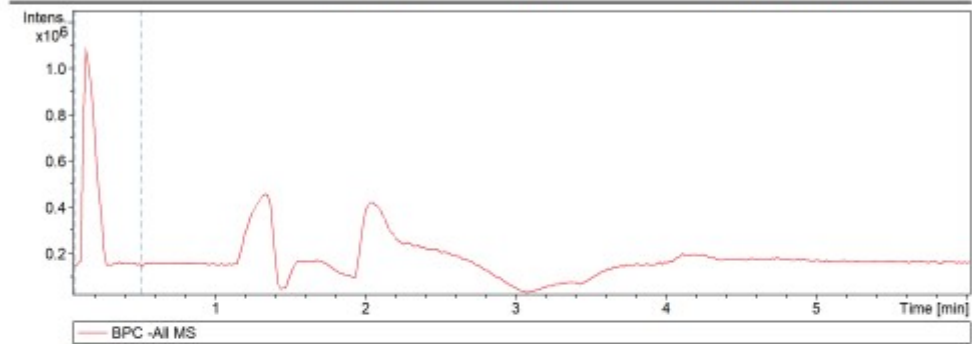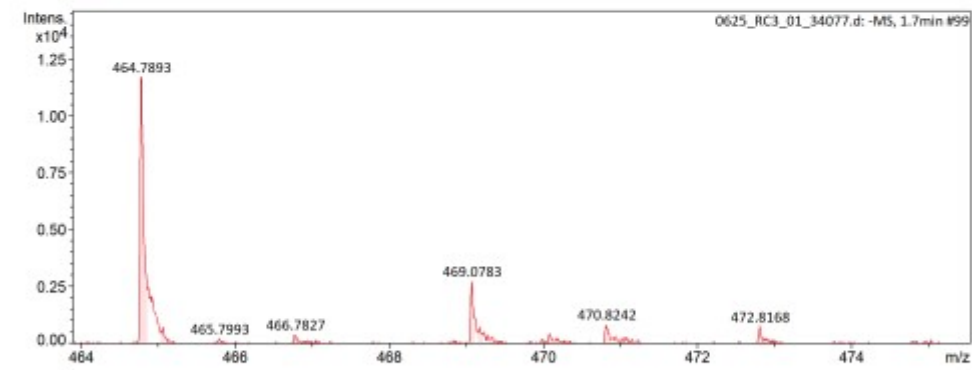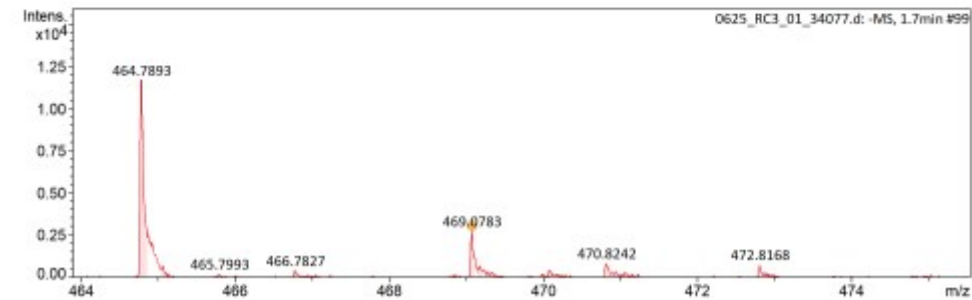

0625\_RC3\_01\_34077.d

Bruker Compass DataAnalysis 4.4 printe 2021/2/17 3:11:49 by: GYJ Page 1 of 1

**Figure S46.** Full HPLC-HRMS spectrum of GSH acted NBD-2FDCI with eluted time at 1.7 min and found m/z 469.0783.

## Display Report

Analysis Info  
Analysis Name C:\Users\23113\Desktop\6.260EX\0625\_RC4\_01\_34078.d  
Method N\_50-1500.m  
Sample Name 0625  
Acquisition D 2024/6/25 18:39:11  
Operator Demo User  
Instrument compact 6255754.2017  
6

### Acquisition Paramet

|             |            |               |          |                  |           |
|-------------|------------|---------------|----------|------------------|-----------|
| Source Type | ESI        | Ion Polarity  | Negative | Set Nebulizer    | 3.0 Bar   |
| Focus       | Not active | Set Capillary | 2800 V   | Set Dry Heater   | 200 °C    |
| Scan Begin  | 50 m/z     | Set End Plate | -500 V   | Set Dry Gas      | 8.0 l/min |
| Scan End    | 1500 m/z   | Set Charging  | 2000 V   | Set Divert Valve | Waste     |
|             |            | Set Corona    | 0 nA     | Set APCI Heater  | 0 °C      |

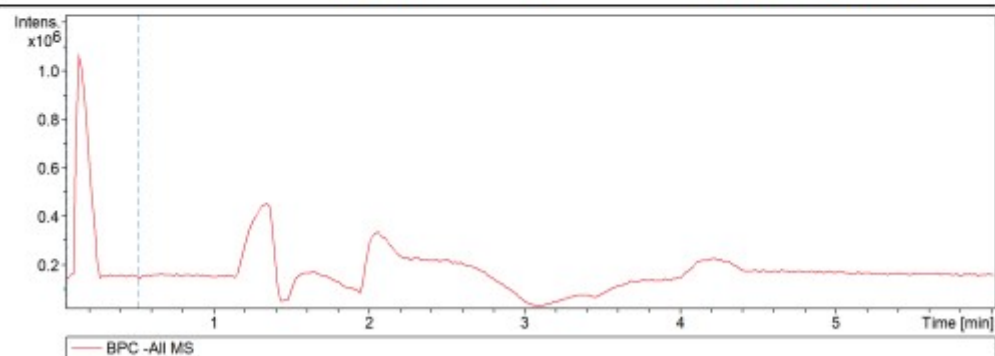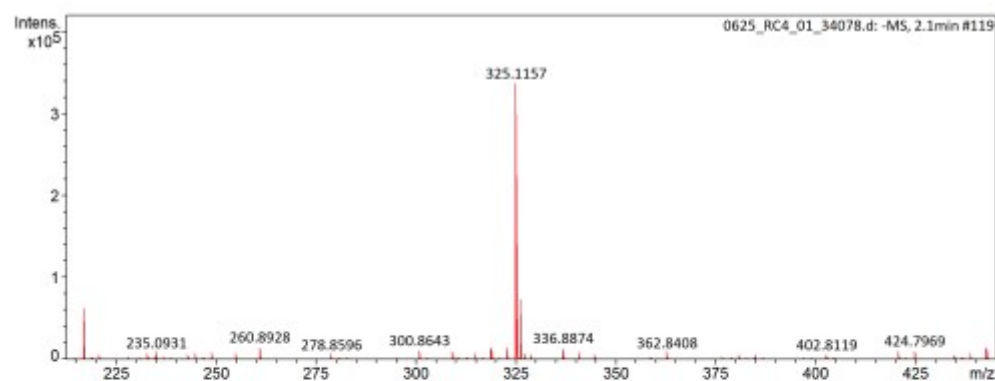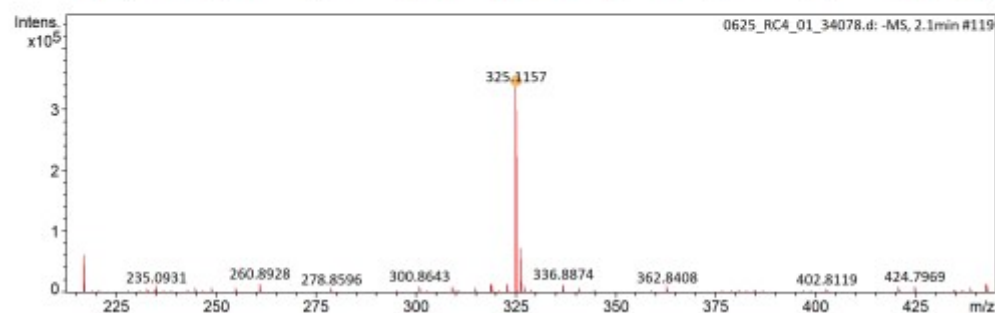

0625\_RC4\_01\_34078.d  
Bruker Compass DataAnalysis 4.4 printe 2021/2/17 8:12:56 by: GYU Page 1 of 1

**Figure S47.** Full HPLC-HRMS spectrum of H<sub>2</sub>S acted NBD-2FDCI with eluted time at 2.0 min and found m/z 325.1157.

# Display Report

Analysis Info Acquisition D 2024/6/25 18:39:11  
Analysis Name C:\Users\23113\Desktop\6.260EEX\0625\_RC4\_01\_34078.d  
Method N\_50-1500.m Operator Demo User  
Sample Name 0625 Instrument compact 8255754.2017  
6

| Acquisition Paramet |            |               |          |                  |           |
|---------------------|------------|---------------|----------|------------------|-----------|
| Source Type         | ESI        | Ion Polarity  | Negative | Set Nebulizer    | 3.0 Bar   |
| Focus               | Not active | Set Capillary | 2800 V   | Set Dry Heater   | 200 °C    |
| Scan Begin          | 50 m/z     | Set End Plate | -500 V   | Set Dry Gas      | 8.0 l/min |
| Scan End            | 1500 m/z   | Set Charging  | 2000 V   | Set Divert Valve | Waste     |
|                     |            | Set Corona    | 0 nA     | Set APCI Heater  | 0 °C      |

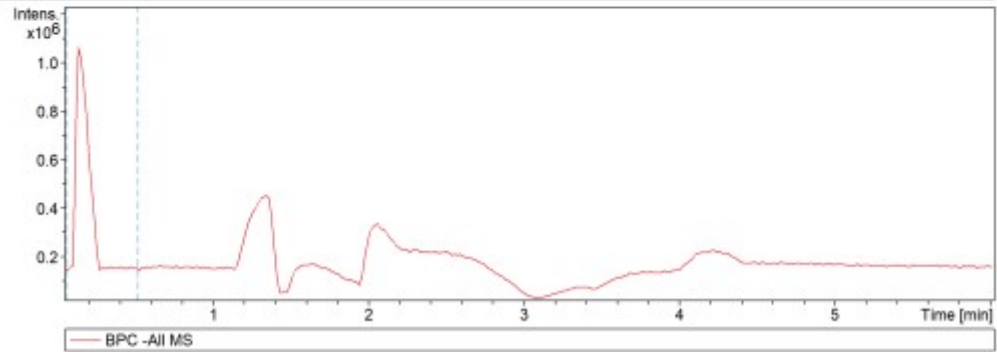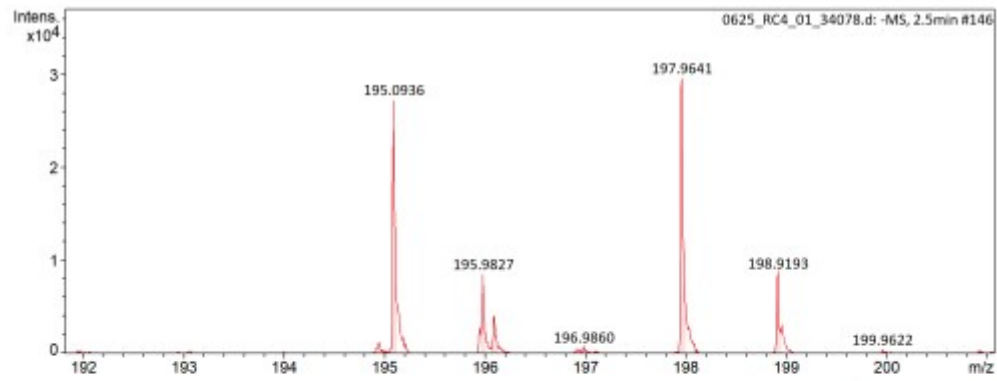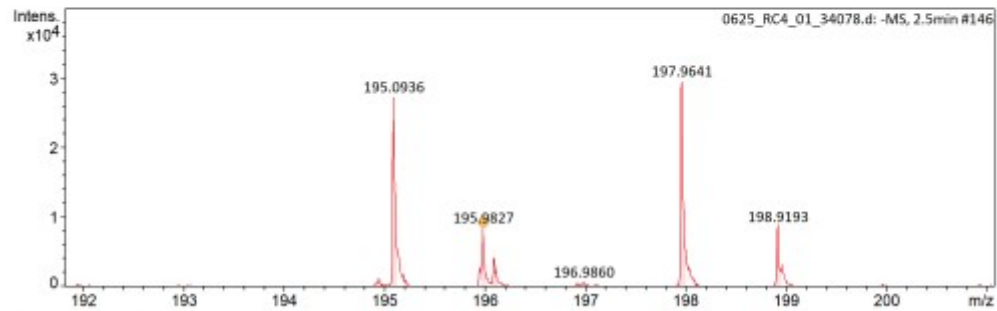

**Figure S48.** Full HPLC-HRMS spectrum of H<sub>2</sub>S acted NBD-2FDCI with eluted time at 2.5 min and found m/z 197.9827.
